1 **Trophic variation within a piscivorous lake trout morph from Great Bear Lake, Canada:**  
2 **The initial step toward ecological specialization?**

3

4 **Running title: Among-individual ecological specialization: lake trout polymorphism**

5

6 Chavarie, L.<sup>1</sup>, K.L. Howland<sup>2,3</sup>, L.N., Harris<sup>2</sup>, C.P. Gallagher<sup>2</sup>, M.J. Hansen<sup>4</sup>, W.M. Tonn<sup>3</sup>,  
7 A.M., Muir<sup>5</sup>, C.C. Krueger<sup>1</sup>.

8

9 <sup>1</sup>Department of Fisheries and Wildlife, Center for Systems Integration and Sustainability,  
10 Michigan State University, 115 Manly Miles Building, 1405 South Harrison Road, East Lansing,  
11 Michigan, USA

12 <sup>2</sup> Fisheries and Oceans Canada, 501 University Crescent, Winnipeg, Canada

13 <sup>3</sup>Department of Biological Sciences, University of Alberta, CW 405 Biological building,  
14 Edmonton, Canada

15 <sup>4</sup>U.S. Geological Survey, Hammond Bay Biological Station, 11188 Ray Road, Millersburg,  
16 Michigan, USA

17 <sup>5</sup>Great Lakes Fishery Commission, 2100 Commonwealth Blvd., Suite 100, Ann Arbor,  
18 Michigan, USA

19

20 \*Corresponding author:

21 Louise Chavarie,

22 Email: [chavarie@zoology.ubc.ca](mailto:chavarie@zoology.ubc.ca)

23

24

25

26

27

28

29

30 **Abstract:**

31 Ecological opportunities present during colonization of novel environments can drive divergent  
32 selection on traits, resulting in specialization of morphs to enhance efficient use of resources.  
33 Thus, in an ecologically polymorphic species, differences in resource specialization should be  
34 found among morphs, and homogeneity in resource use expected within a morph. Using one of  
35 four morphs in Great Bear Lake, we investigate whether specialization of trophic resources  
36 among individuals occurs within this single morph, which could indicate a potential for  
37 continued divergence. Four distinct dietary patterns of resource use within the lake trout morph  
38 were detected from fatty acid composition. Feeding habits of different groups within the morph  
39 were not associated with detectable morphological or genetic differentiation, suggesting that  
40 behavioral plasticity may have caused the trophic variation within this morph. A low level of  
41 genetic differentiation was detected between exceptionally large-sized individuals and other  
42 individuals. Investigating a geologically young system that displays high levels of intraspecific  
43 diversity and focusing on dietary patterns of resource use variation of individuals suggested that  
44 individual specialization can occur within a morph.

45

46 **Keywords:** Among-individual resource specialization, polymorphism, fatty acids, genetic,  
47 morphology.

48

49

50

51

52

53 **Introduction:**

54           Intraspecific diversity within fish species that have colonized post-glacial lakes may  
55 represent early stages of ecological speciation (Snorrason and Skúlason 2004). Given a novel  
56 environment and new ecological opportunity, a monomorphic population may begin to diverge  
57 on a variety of evolutionary trajectories. Intraspecific diversity can begin with adaptive variation  
58 along selection gradients in the absence of reproductive isolation, and potentially progress to  
59 adaptive differentiation and reproductive isolation (Hendry 2009; Seehausen and Wagner 2014;  
60 Snorrason and Skúlason 2004; Svanbäck et al. 2009a). Many fishes that have colonized post-  
61 glacial freshwater systems may be considered generalists (i.e., flexible in use of habitat and food  
62 resources) (Snorrason and Skúlason 2004). If recently colonized systems become stable and  
63 predictable, foraging and habitat specialization may lead to eco-morphological diversification,  
64 which has potential to promote reproductive isolation, further divergence, and ultimately  
65 speciation (Skúlason et al. 1999; Snorrason and Skúlason 2004; Van Kleunen and Fischer 2005).  
66 Phenotypic plasticity, the capacity for one genotype to produce different phenotypes in response  
67 to environmental cues, could be a character (the capacity) subject to selection, facilitating  
68 evolution (De Jong 2005). Despite uncertainties of how phenotypic plasticity promotes  
69 diversification and its role in speciation, plasticity appears to serve as an important element in  
70 early phases of diversification (Handelsman et al. 2013; Nonaka et al. 2015; Snorrason and  
71 Skúlason 2004).

72           Phenotypic plasticity in temporally and spatially varying environments has been  
73 demonstrated repeatedly within and among populations, but whether niche expansion of a  
74 population is achieved by a general increase in niche widths for all individuals overall or by an  
75 increase of among-individual variation (i.e., expression of multiple individual specializations

76 within a population), is a question that has been raised repeatedly (Bolnick et al. 2003;  
77 Roughgarden 1972; Svanbäck and Persson 2004; Svanbäck and Schluter 2012). Several apparent  
78 generalist populations have been reported to be composed of a combination of specialized  
79 individuals using several narrow niches that in combination yield an overall wide population  
80 niche (Araújo et al. 2008; Svanbäck and Persson 2004; Svanbäck and Schluter 2012; Woo et al.  
81 2008). Characterization of niche use among individuals is necessary to understand the role that  
82 individual variation can play at the beginning of adaptive divergence and in potentially  
83 promoting polymorphism and speciation (Klemetsen 2010; Svanbäck and Persson 2004;  
84 Svanbäck and Bolnick 2005; Svanbäck et al. 2015).

85         The mechanisms underlying variation in the magnitude and effect of individual  
86 specialization in different freshwater systems, species, and trophic positions are poorly  
87 understood (Cloyd and Eason 2016; De León et al. 2012; Svanbäck et al. 2015). Depauperate  
88 ecosystems, with low interspecific competition provide ecological opportunities favoring niche  
89 expansion (Bolnick et al. 2010b; Costa et al. 2008; Parent et al. 2014). Flexibility within  
90 colonizing species with high levels of genetic variation and phenotypic plasticity, in which  
91 individuals have the potential to exploit a wide range of resources, provides potential for the  
92 evolution of individual resource specialization and population divergence. The trophic position  
93 of a species may also affect the degree of individual variation and diversification within a  
94 population as evidence suggests that among-individual variation in diet may be greatest at  
95 intermediate trophic positions (Collar et al. 2009; Svanbäck et al. 2015).

96         Great Bear Lake (Northwest Territories, Canada) straddling the Arctic Circle provides an  
97 excellent opportunity to investigate the role of among-individual variation in diversification.  
98 Lake trout, *Salvelinus namaycush*, with this lake show a high degree of intraspecific diversity

99 within a geologically young system (8,000–10,000 yr BP) (Johnson 1975; Pielou 2008).  
100 Specifically, extensive sympatric divergence occurs for this species within the shallow-water ( $\leq$   
101 30 m) zone of Great Bear Lake (Chavarie et al. 2013; Chavarie et al. 2015; Chavarie et al.  
102 2016b; Harris et al. 2015). Morph 1 is characterized by a small head and intermediate-sized fins.  
103 Morph 2 has the largest head and jaws but smallest fins of the morphs. Morph 3 has the longest  
104 fins and a robust body shape (i.e., deep body depth). Morph 4 has a thick curved lower jaw and  
105 the smallest caudal peduncle depth of the morphs (Fig. A1) (Chavarie et al. 2013; Chavarie et al.  
106 2015). Three of these four shallow-water lake trout morphs are described as trophic generalists  
107 with differing degrees of omnivory along a weak benthic-pelagic gradient (Chavarie et al. 2016a;  
108 Chavarie et al. 2016b). Despite habitat and dietary overlap, significant differences in  
109 morphological, genetic, and life-history variation have been reported (Chavarie et al. 2013;  
110 Chavarie et al. 2016 ; Harris et al. 2015), suggesting that rather than two or more discrete  
111 phenotypes specialized for different resources and habitats, these morphs function as trophic  
112 generalists (Chavarie et al. 2016b; Svanbäck et al. 2009b).

113 Furthermore, fatty acid and stomach content analyses of the four lake trout morphs  
114 suggested homogenous resource use among morphs, but this observation could be caused by the  
115 combination of specializations by individuals along a resource continuum (Chavarie et al.  
116 2016a). In other words, whereas morph resource use may appear similar, individuals within a  
117 morph may differ in their resource use. One morph (Morph 2; generalist with a tendency to  
118 consume more fish than other morphs, referred to here as the piscivorous morph; Fig. 1) showed  
119 at least two different feeding strategies, benthic cannibalism and interspecific piscivory in the  
120 pelagic zone. Overall, the piscivorous morph had a streamlined body shape, large gape, and high  
121 growth rates throughout life, characteristics indicative of piscivory (Chavarie et al. 2013;

122 Chavarie et al. 2015; Chavarie et al. 2016 ). Finally, the piscivorous morph displayed a modest  
123 level of genetic differentiation from the three other morphs (Harris et al. 2015).

124 To characterize individual variation within a morph in relation to observed differentiation  
125 of feeding strategies, the current study focused solely on the piscivorous lake trout morph.  
126 Samples from previous collections (Chavarie et al. 2016a; Harris et al. 2015), plus some  
127 additional fish, were analyzed for fatty acid composition. Fatty acids analysis assumes that  
128 dietary lipids are broken down into their constituent fatty acids and incorporated relatively  
129 unchanged into the consumer tissues (Howell et al. 2003; Iverson 2009; Iverson et al. 2004),  
130 allowing spatial and temporal diet comparison between organisms (Duerksen et al. 2014;  
131 Eloranta et al. 2011; Hoffmann 2017; Iverson 2009; Scharnweber et al. 2016). Due to their lack  
132 of ability to modify fatty acids, overall modification of dietary fatty acids in fish is probably  
133 related to dietary deposition, resulting in a robust tool to represent lake trout diet (Happel et al.  
134 2017a; Happel et al. 2016; Happel et al. 2017b; Iverson 2009). Thus, fatty acids were used as  
135 trophic bio-indicators to better understand dietary patterns of piscivorous lake trout and  
136 investigate whether individual specialization may be contributing to trophic breadth and  
137 variation observed among individuals in this morph. Specifically, our aims were to 1) compare  
138 resource use among piscivorous lake trout individuals (Morph 2) by characterizing their fatty  
139 acids profiles, 2) determine whether resource-use differences were influenced by life-history  
140 traits (e.g., size and age), 3) characterize the extent of morphological variation individuals  
141 present among groups expressing different feeding strategies, and 4) determine if genetic  
142 differences existed among groups. In addition, we examined a sub-set of large lake trout from  
143 our collections ( $\geq 900$  mm in fork length) referred to locally as “Giants” (Fig. 1), to determine if  
144 they showed any ecological and genetic differences. These exceptionally large individuals

145 comprise < 1% of the lake trout population in Great Bear Lake, and are among the largest lake  
146 trout in the world (Chavarie et al. 2016 ). Except for their large body-size, these individuals  
147 exhibit no major morphological or spatial and temporal distribution differences relative to other  
148 co-occurring piscivorous lake trout. By focusing on trophic variation within a specific morph, we  
149 aimed to advance our understanding of ecological and evolutionary processes operating within a  
150 geologically young ecosystem that provides resource potential sufficient for promoting  
151 intraspecific divergence (Bhat et al. 2014; Coyne and Orr 2004; Hudson et al. 2016).

## 152 **Methods**

### 153 *Study area and field sampling*

154 Great Bear Lake is an oligotrophic Arctic freshwater system, 250 km south of the Arctic  
155 Ocean, in Northwest Territories, Canada (N66° 06' W120° 35') (Johnson 1975). As the world's  
156 ninth largest and 19<sup>th</sup> deepest lake, the lake has a complex, multi-armed surface area of 31,790  
157 km<sup>2</sup> and a maximum depth of 446 m (mean depth = 90 m). Great Bear Lake was formed by  
158 scouring from the Laurentide ice-sheet during the Pleistocene and was originally part of glacial  
159 Lake McConnell 8,000–10,000 yr BP (Johnson 1975; Pielou 2008). The lake has characteristics  
160 typical of an arctic lake: ultra-oligotrophic, short ice-free season, and a simple food web  
161 supporting only 15 fish species (Alfonso 2004; Johnson 1975; MacDonald et al. 2004). Great  
162 Bear Lake lacks a commercial fishery but plays an important role in the local economy,  
163 supporting a fly-in sport fishery for tourists and a subsistence fishery for the small Sahtu  
164 community of Déline. Great Bear Lake has considerable intraspecific diversity within lake trout,  
165 lake whitefish (*Coregonus clupeaformis*), and cisco (*C. artedi*) (Chavarie et al. 2013; Howland et  
166 al. 2013).

167 Piscivorous lake trout were caught at depths  $\leq 30$  m using paired bottom sets (ca. 24 h) of  
168 140-mm and multi-mesh (38–140 mm) stretched-mesh gill nets during end of July and August  
169 over multiple years (2002–2011) among all five arms of the lake (Chavarie et al. 2013; Chavarie  
170 et al. 2015; Chavarie et al. 2016a). During 2012–2014, multi-mesh gill nets (38 to 140 mm), with  
171 a typical soak time of 24 hours, were distributed across random depth-stratified sites (0–150 m)  
172 among Keith, McVicar, and McTavish arms (Table A1). We focused on adult trout due to the  
173 difficulty of classifying juveniles into morphs (Chavarie et al. 2013; Zimmerman et al. 2006;  
174 Zimmerman et al. 2007) and to avoid the confounding effects of ontogenetic shifts in  
175 morphology and diet. Of 79 fish analyzed herein, 35 piscivorous lake trout (Morph 2) were  
176 previously analyzed for fatty acids by Chavarie et al. (2016a) and 44 fish were new to the current  
177 diet analysis. Fish were randomly selected from the collections analyzed morphologically by  
178 Chavarie et al. (2015) to include a range of sizes and ages within the piscivorous morph. For the  
179 Giant individuals, lake trout with fork length  $\geq 900$  mm were targeted. A left lateral full-body  
180 digital image was taken for each lake trout caught according to the procedures in Muir et al.  
181 (2012). Measurements, tissues, and structures were sampled for determination of biological  
182 characteristics related to life-history, including otoliths, fork length, somatic weight, sex, and  
183 stage of maturity (i.e., immature, current year spawner, or resting) (Chavarie et al. 2013;  
184 Chavarie et al. 2016 ). A dorsal muscle sample was removed and frozen at  $-20^{\circ}\text{C}$  for fatty acids  
185 analysis (Budge et al. 2006; Kavanagh et al. 2010; Loseto et al. 2009) and tissue from pectoral  
186 fins was collected and preserved in ethanol for genetic analyses.

#### 187 *Fatty Acids*

188 Analysis of 41 dietary fatty acids was carried out using procedures described by Chavarie  
189 et al. (2016a) (Table 1) . Muscle samples were freeze-dried, and subsequently homogenized with



190 a mortar and pestle. Lipids were extracted overnight from 1 g of the homogenate in a 2:1  
191 chloroform-methanol solution containing 0.01% BHT (v/v/w) at  $-20^{\circ}\text{C}$  (Folch et al. 1957). After  
192 extraction, samples were filtered through Whatman Grade 1 Qualitative filter paper and the filter  
193 paper/sample was rinsed twice with 2 ml of the 2:1 chloroform:methanol. Sample extract was  
194 collected in a test tube and 7 ml of 0.88 N NaCl solution was added to encourage fatty acids to  
195 move into the organic (chloroform) layer. The aqueous layer was discarded after which the  
196 chloroform was dried with sodium sulfate prior to total lipid measurement. The extracted lipid  
197 was used to prepare fatty acid methyl esters (FAME) by transesterification with Hilditch reagent  
198 (0.5 N  $\text{H}_2\text{SO}_4$  in methanol) (Morrison and Smith 1964). Samples were heated for 1 h at  $100^{\circ}\text{C}$ .  
199 Gas chromatographic (GC) analysis was performed on an Agilent Technologies 7890N GC  
200 equipped with a 30 m J&W DB-23 column (0.25 mm I.D; 0.15  $\mu\text{m}$  film thickness). The GC was  
201 coupled to a Flame Ionization Detector operating at  $350^{\circ}\text{C}$ . Hydrogen was used as carrier gas  
202 flowing at 1.25 ml/min for 14 minutes, and increased to 2.5 ml/min for 5 min. The split/splitless  
203 injector was heated to  $260^{\circ}\text{C}$  and run in splitless mode. The oven program was as follows:  $60^{\circ}\text{C}$   
204 for 0.66 min, increasing by  $22.82^{\circ}\text{C}/\text{min}$  to  $165^{\circ}\text{C}$  with a 1.97 min hold; increasing by  $4.56$   
205  $^{\circ}\text{C}/\text{min}$  to  $174^{\circ}\text{C}$  and by  $7.61^{\circ}\text{C}/\text{min}$  to  $200^{\circ}\text{C}$  with a six min hold. Peak areas were quantified  
206 using Agilent Technologies ChemStation software. Fatty acids standards were obtained from  
207 Supelco (37 component FAME mix) and Nuchek (54 component mix GLC-463).

208 All fatty acids values were converted to a mass percentage of the total array, and were  
209 named according the IUPAC nomenclature as X:Y n-z, where X is the number of carbon atoms  
210 in the fatty acids, Y is the number of methylene-interrupted double bonds in the chain, and n-z  
211 denotes the position of the last double bond relative to the methyl terminus (Ronconi et al. 2010).  
212 Fatty acids suggested by Iverson et al. (2004) as important dietary fatty acids, which transfer

213 from prey to predator, were used in our analyses. Fatty acids profiles (% of fatty acids) were  
214 transformed using arcsin square-root function. Fatty acids groups were identified using a  
215 multivariate analysis R Package (Team 2017), FactoMineR, using a hierarchical clustering  
216 analysis based on principal components (Husson et al. 2012). To reduce the number of variables  
217 used, A SIMPER (similarity percentage routine) was used to assess which fatty acids primarily  
218 were responsible for observed differences among groups (King and Jackson 1999). A principal  
219 component analysis (PCA) was performed on the fatty acids profiles with PC-ORD version 6  
220 (McCune and Mefford 2011) among piscivorous groups to provide inferences about patterns of  
221 resource use as defined by Chavarie et al. (2016a). Permutational Multivariate Analysis of  
222 Variance (PERMANOVA), a non-parametric analog of Multivariate analysis of variance  
223 (MANOVA), was used to test for differences in fatty acid composition among the groups  
224 identified by the hierarchal cluster analysis process. PERMANOVA was performed in Primer 7  
225 (Primer E, Plymouth, UK) using 9999 permutations. Pairwise *post-hoc* comparison followed to  
226 test differences among groups. Finally, the fatty acid groups were tested for differences in depth  
227 of capture using one way analysis of similarities (ANOSIM) with 9999 permutations using  
228 PAST 3 (Hammer et al. 2001).

### 229 *Life-history*

230 To determine if fatty acid groups differed in size-at-age, length vs. age was modeled  
231 using the Von Bertalanffy length-age model fit to length at age-of-capture of individual fish  
232 (Quinn and Deriso 1999):

$$233 \quad L_t = L_\infty \left(1 - e^{-K(t-t_0)}\right)^e$$

234 The length-age model describes length  $L_t$  at age-of-capture  $t$  as a function of theoretical  
235 maximum length ( $L_\infty = \text{mm}$ ), instantaneous rate at which  $L_t$  approaches  $L_\infty$  ( $K = 1/\text{year}$ ),

236 theoretical age-at-zero length ( $t_0$  = years), and multiplicative error ( $\epsilon$ ). Model parameters,  $L_\infty$ ,  $K$ ,  
237 and  $t_0$ , and associated standard errors were estimated using nonlinear regression. Residual sums-  
238 of-squares were compared between a full model (separate models for each group) to a reduced  
239 model (a single model for all groups) in a likelihood-ratio test (Hosmer Jr et al. 2000). If the  
240 likelihood-ratio test was significant ( $P \leq 0.05$ ), we concluded that growth differed among groups  
241 identified by fatty acids (79 lake trout). If the likelihood-ratio test was not significant ( $P > 0.05$ ),  
242 we concluded that growth did not differ among groups. The same test was repeated for each pair  
243 of groups, with and without the Giant form (fork length  $\geq 900$  mm) included in each group, to  
244 isolate the influence of this sub-set in our size-at-age comparison due to the prevalence of Giants  
245 in Group 3.

#### 246 *Genetic analyses*

247 To determine if genetic differences existed among individuals expressing different  
248 feeding strategies, 79 lake trout classified by fatty acid composition into four groups were  
249 genotyped to determine genetic variation and structure within and among groups. To allow a  
250 sample size sufficient for making a genetic comparison of the Giant to the other dietary groups,  
251 22 additional individuals determined non-randomly by their size ( $\geq 900$  mm ; Giant sub-set)  
252 from the 2002-2015 collections were added to the Giant processed for fatty acids, for a total of  
253 39 Giants for genetic analysis. Lake trout DNA was extracted from pectoral fin tissue preserved  
254 in ethanol using DNEasy extraction kits (Qiagen Inc., Valencia, CA) following manufacturer  
255 protocols. Piscivorous groups were assayed using a suite of 23 putatively neutral microsatellite  
256 markers amplified in four multiplexes previously described in Harris et al. (2015). Amplified  
257 microsatellite fragments were analyzed using an automated sequencer (ABI 3130xl Genetic  
258 Analyzer; Applied Biosystems, Foster City, CA). The LIZ 600 size standard was incorporated

259 for allele base-size determination. All genotypes were scored using GeneMapper software ver.  
260 4.0 (Applied Biosystems) and then manually inspected to ensure accuracy.

261 The program MICROCHECKER ver. 2.2.0.3 (Van Oosterhout et al. 2004) was used to  
262 identify genotyping errors, specifically null alleles and large allele dropout. Observed and  
263 expected heterozygosity ( $H_E$  and  $H_O$ ) were calculated using GENEPOP ver. 4.2 (Rousset 2008).  
264 The program HP-RARE ver. 1.1 (Kalinowski 2005) was used to determine the number of alleles,  
265 allelic richness, and private allelic richness for each group, sampling 22 genes in each sample.  
266 Tests of departure from Hardy-Weinberg equilibrium and genotypic linkage disequilibrium  
267 within each sample (i.e., for each fatty acid grouping and the Giant sub-set) were conducted in  
268 GENEPOP using default values for both. Results from all tests were compared with an adjusted  
269 alpha ( $\alpha = 0.05$ ) following the False Discovery Rate procedure (Narum 2006).

270 We used the POWSIM V. 4.1 analysis to assess the statistical power of our microsatellite  
271 data set given the observed allelic frequencies within our samples in detecting significant genetic  
272 differentiation between sampling groups (Ryman and Palm 2006). For POWSIM analyses, we  
273 assumed that Lake Trout within our study diverged from a common baseline population with the  
274 same allelic frequencies as observed in our contemporary samples. Simulations were performed  
275 with an effective population size of 5000 to yield values of  $F_{ST}$  of 0.01, 0.005 and 0.001. The  
276 significance of tests in POWSIM were evaluated using Fisher's exact test and the  $\chi^2$  test and the  
277 statistical power was determined as the proportion of simulations for which these tests showed a  
278 significant deviation from zero. All simulations were performed with 1000 iterations.

279 Genetic structuring was tested among lake trout groups using several different methods.  
280 First, genotypic differentiation among lake trout groups was calculated using log-likelihood (G)  
281 based exact tests (Goudet et al. 1996) implemented in GENEPOP. Global  $F_{ST}$  ( $\theta$ ) (Weir and

282 Cockerham 1984) was calculated in FSTAT ver. 2.9.3 (Goudet 1995) and pairwise comparisons  
283 of  $F_{ST}$  between groups were calculated in ARLEQUIN ver. 3.5 (Excoffier et al. 2005) using  
284 10,000 permutations. We then employed the Bayesian clustering program STRUCTURE V.  
285 2.3.2 (Pritchard et al. 2000) to resolve the putative number of populations (i.e., genetic clusters  
286 (K)) within our samples. Owing to the remarkably low levels of genetic differentiation among  
287 lake trout in the Great Bear Lake (Harris et al. 2013; Harris et al. 2015), we employed the  
288 LOCPRIOR algorithm (Hubisz et al. 2009). The LOCPRIOR algorithm considered the  
289 location/sampling information as a prior in the model, which may perform better than the  
290 traditional STRUCTURE model when the genetic structure is weak (Hubisz et al. 2009). We also  
291 incorporated an admixture model with correlated allelic frequencies and the model was run with  
292 a burn-in period of 500,000 iterations and 500,000 Markov chain Monte Carlo iterations. We  
293 varied the potential number of populations (K) from 1 to 10 and we ran 20 iterations for each  
294 value of K. The STRUCTURE output was first processed in the program STRUCTURE  
295 HARVESTER (Earl 2012), followed by the combination of results of independent runs of the  
296 program and compilation of results based on  $\ln P(D)$  and the post hoc  $\Delta K$  statistic of Evanno et  
297 al. (2005), to infer the most likely number of clusters. The best alignment of replicate runs was  
298 assessed with CLUMPP V. 1.1 (Jakobsson and Rosenberg 2007) and DISTRICT V. 1.1  
299 (Rosenberg 2004) was then used to visualize the results. For STRUCTURE analyses, we  
300 reported both  $\ln P(D)$  and the post hoc  $\Delta K$  statistic.

301 Finally, Discriminant Analysis of Principal Components (DAPC) (Jombart et al. 2010)  
302 was implemented in the Adegenet package (Jombart 2008) in R (Team 2015). The number of  
303 clusters was identified using the *find.clusters* function (a sequential K-means clustering  
304 algorithm) and subsequent Bayesian Information Criterion (BIC), as suggested by Jombart et al.

305 (2010). Stratified cross-validation (carried out with the function *xvalDapc*) was used to  
306 determine the optimal number of principal components to retain in the analysis.

### 307 *Morphology*

308 Morphological variation was quantified for the 79 lake trout to compare fatty acid  
309 groupings (different feeding strategies) to morphological variation within the piscivorous morph.  
310 Twenty-three landmarks, 20 semi-landmarks based on Chavarie et al. (2015), and fourteen linear  
311 measurements based on Muir et al. (2014), were used to characterize body and head shape from  
312 photographed fish. The combination of traditional and geometric morphometrics was used  
313 because of the empirical relationships of phenotype with foraging (e.g., jaw size) and swimming  
314 (e.g., fin lengths and caudal peduncle depth) (Kahilainen et al. 2004; Kristjánsson et al. 2002;  
315 Webb 1984). Landmarks and semi-landmarks were digitized in x and y coordinates using  
316 TPSDig2 software (<http://life.bio.sunysb.edu/morph>). Subsequently, digitized landmarks and  
317 semi-landmarks were processed in a series of Integrated Morphometrics Programs (IMP) version  
318 8 (<http://www2.canisius.edu/~sheets/morphsoft>), using partial warp scores, which are thin-plate  
319 spline coefficients. Morphological methods and programs are described in Zelditch et al. (2012)  
320 and specific procedures were described in further detail in Chavarie et al. (2013). All  
321 morphological measurements were size-free, using centroid sizes or residuals from regressions  
322 on standard length (Zelditch et al. 2012).

323 Canonical Variate Analyses (CVA) were conducted on all morphological data, including  
324 body shape, head shape, and linear measurements, to determine relationships among groups  
325 identified by fatty acid composition. Body and head shape were analysed using CVAGen8 from  
326 the IMP software (Zelditch et al. 2012) and for linear measurements, CVA was analyzed with  
327 SYSTAT (Systat Software Inc., Chicago, IL, USA). Single Factor Permutation MANOVA with

328 10 000 permutations tested for differences among groups and determined the percentage of  
329 variation explained for a grouping if a CVA was significant. For linear measurements, a  
330 Bonferroni-corrected post-hoc test followed MANOVA to identify measurements that differed  
331 among group. Principal component analyses (PCA) were performed on body- and head-shape  
332 data using PCAGen8 (IMP software) among groups to visualize morphological variation within  
333 the dataset. PC-ORD version 6 software (McCune and Mefford 2011) was used to perform a  
334 PCA on the linear measurements.

## 335 **Results**

### 336 *Fatty acids*

337 On the basis of fatty acid composition, piscivorous lake trout were divided along a resource use  
338 axis into four groups (Fig. 2 and A2; Table 1). Overall, 14 individuals were assigned in Group 1,  
339 16 individuals in Group 2, 21 individuals in Group 3, and 28 individuals in Group 4. Average  
340 dissimilarity was 14.61 from the SIMPER analysis, whereas the most discriminating 26 fatty  
341 acids, explaining together ~89% of the separation among groups, were: 22:6n-3 (12.5 %), 18:1n-  
342 9 (10.8 %), 16:1n-7 (6.8 %), 20:5n-3 (5.0 %), 20:4n-6 (3.9 %), 18:2n-6 (3.8 %), 22:4n-3 (3.7 %),  
343 16:0 (3.5%), 20:4n-3 (3.3%), 18:1n7 (3.3%), 20:2n-6 (3.1%), 14:0 (2.8%), 20:1n-9 (2.7%),  
344 22:5n-6 (2.7%), 20:3n-3 (2.3%), 22:2n-6 (2.1%), 18:0 (2.0%), 18:3n-3 (1.9%), 18:4n-3 (1.8%),  
345 22:4n-6 (1.7%), 20:1n-7 (1.5%), 22:5n-3 (1.4%), 21:5n-3 (1.3%), 22:1n-11 (1.2%), 20:0 (1.2%),  
346 16:4n-3 (1.2%), and 16:2n-4 (1.1%) (Table 1). The first two axes of the fatty acids PCA  
347 explained 65.2 % of the variation in diet and the four groups were supported by PERMANOVA  
348 ( $F_{3,76} = 39.4$ ,  $P < 0.01$ ) and pairwise comparisons between all pairs (all  $P < 0.01$ ). Finally, depth  
349 of capture did not differ among groups identified by fatty acids profiles ( $p \geq 0.05$ ). For all  
350 groups, the majority of lake trout were caught between 0-20 m (Fig. A3).

351 *Life-history*

352 Overall, life history parameters did not differ among lake trout groups identified by fatty  
353 acid composition. Length-age models did not differ among fatty acid groups, based on overall  
354 likelihood-ratio tests (Fig. 3;  $F_{9, 63} = 1.58$ ;  $P = 0.141$ ). With the Giant sub-set included, growth  
355 differed between Group 3 and Group 4 ( $F_{3, 41} = 3.958$ ;  $P = 0.014$ ), but not between Groups 1 and  
356 2 ( $F_{3, 22} = 0.408$ ;  $P = 0.749$ ), Groups 1 and 3 ( $F_{3, 27} = 0.410$ ;  $P = 0.747$ ), Groups 1 and 4 ( $F_{3, 34} =$   
357  $0.930$ ;  $P = 0.437$ ), Groups 2 and 3 ( $F_{3, 29} = 1.820$ ;  $P = 0.166$ ), or Groups 2 and 4 ( $F_{3, 36} = 1.058$ ;  
358  $P = 0.379$ ). Without Giants included (prevalence of Giants was higher in Group 3 than Group 1,  
359 Group 2, and Group 4), none of the paired groups (morphs) differed for length-at-age: Groups 1  
360 vs. 2 ( $F_{3, 16} = 0.353$ ;  $P = 0.787$ ); Groups 1 vs. 3 ( $F_{3, 13} = 0.958$ ;  $P = 0.441$ ); Groups 1 vs. 4 ( $F_{3, 30}$   
361  $= 1.458$ ;  $P = 0.246$ ); Groups 2 vs. 3 ( $F_{3, 17} = 1.254$ ;  $P = 0.321$ ); Groups 2 vs. 4 ( $F_{3, 34} = 1.431$ ;  $P =$   
362  $0.251$ ); and Groups 3 vs. 4 ( $F_{3, 31} = 2.062$ ;  $P = 0.126$ ).

363 *Genetic differentiation*

364 Little genetic differentiation was evident among piscivorous lake trout groups, except for  
365 the Giant sub-set, which differed slightly from other groups defined by fatty acids. The program  
366 MICROCHECKER identified two loci (OtsG253b and Sco102) that contained null alleles. These  
367 loci, along with non-variable loci Sco218 and SSOSL456, were removed, leaving 19 informative  
368 loci for subsequent analyses. Descriptive statistics of genetic variation were similar among  
369 groups. The number of alleles per locus ranged from four (Smm21) to 41 (SnaMSU10) and  
370 averaged 28.75 across all loci. Observed heterozygosity averaged across all loci ranged from  
371 0.78 (Giant) to 0.83 (Group 1) while expected heterozygosity ranged from 0.84 (all groups with  
372 the exception of Group 1) to 0.85 (Group 1; Table 2). Allelic richness ranged from 9.57 (Group 2  
373 and 4) to 9.87 (Group 1), while expected private allelic richness ranged from 0.87 (Group 3) to



374 1.08 (Group 2; Table 2). Departures from Hardy-Weinberg equilibrium were found in 15 of 95  
375 tests (at  $\alpha = 0.05$ ), but only five (all of which involved different loci) were significant after  
376 adjustment for False Discovery Rate (adjusted  $\alpha = 0.01$ ). Of those five, all were heterozygote  
377 deficits and three of five departures involved the Giant sub-set. Significant linkage  
378 disequilibrium was evident in 14 of 885 tests ( $\alpha = 0.05$ ), but only nine were significant after  
379 adjusting for False Discovery Rate (adjusted  $\alpha = 0.0068$ ). No locus-pair linkage disequilibrium  
380 combinations were consistently significant, but seven of nine departures were in the Giant sub-  
381 set.

382 Using our microsatellite data set, the POWSIM analysis indicated a 100% power of  
383 detecting a  $F_{ST}$  value as low of 0.01 and 0.005. However, power was reduced to 77% when  
384 assessing genetic differentiation at a  $F_{ST}$  of 0.001. Overall our microsatellite data set (including  
385 the number of loci, alleles per locus, and sample sizes) had sufficient power to detect relatively  
386 low levels of genetic differentiation.

387 Global genetic differentiation was extremely low ( $\theta = 0.001$ , 95% c.i. =  $-0.002-0.005$ )  
388 among groups of piscivorous lake trout assessed. Pairwise  $F_{ST}$  ranged from  $-0.004$  to  $0.016$   
389 (Table 3) whereas comparisons that included Giants always differed the most from the other fatty  
390 acid groups, and were also the only significant pairwise comparisons ( $P < 0.05$ , Table 3). The  $F_{ST}$   
391 value for the Giant vs. Group 1 and 4 were similar to genetic differentiation previously observed  
392 among four lake trout morphs in Great Bear Lake (Table 3), with the exception of Morph 1 vs  
393 Morph 2 [32]. Bayesian clustering implemented in STRUCTURE provided evidence for two  
394 genetic clusters when evaluating both  $\ln P(D)$  or  $\Delta K$  (Table A2). The admixture plot based on  
395  $K=2$  showed no clear genetic structure among groups defined by fatty acid analysis, however,  
396 some differentiation of the Giant sub-set from the fatty acid groups was observed (Fig. 4).

397 Finally, the Bayesian information criterion in the DAPC analysis (BIC = 185.42, Table  
398 A3, Fig. A5 A) suggested that two clusters best explained genetic structure in our study (30 PCs  
399 retained as suggested by the cross-validation procedure; Fig. A5 B). A compoplot (barplot  
400 showing the probabilities of assignment of individuals to the different clusters) for K=2 revealed  
401 no clear genetic structure between two groups identified by the DAPC analysis with the  
402 exception of the Giant group which appeared to have more individuals assigned to cluster two  
403 (Fig 4). Density plots of the discriminant function, however, do show that the two clusters  
404 identified through the DAPC analysis are mostly non-overlapping (Fig. A5 C).

#### 405 *Morphology*

406 Morphological variation was low among four dietary groups within the piscivorous  
407 morph. The first canonical axis for body shape CVA was significant ( $P > 0.05$ ), but head shape  
408 CVA revealed no significant canonical axes ( $P > 0.05$ ) in groupings (Fig. 5 a, b, c). MANOVAs  
409 for body and head shape were not significant ( $P > 0.05$ ). Linear measurements CVA revealed one  
410 significant canonical axis ( $P > 0.05$ ). MANOVA permutation tests confirmed differences in linear  
411 measurements among groups for linear measurements ( $P = 0.047$ ). Most distinctions were related  
412 to linear measurements of heads, whereas upper and lower jaws, head depth, and snout-eye  
413 lengths differed between Group 3 and Group 4 ( $P \leq 0.05$ ), and head length differed between  
414 Group 1 and 4 ( $P = 0.03$ ; Fig. 6). Caudal peduncle length and anal fin length differed marginally  
415 between Group 2 vs 3 ( $P = 0.068$ ) and Group 1 vs 3 ( $P = 0.075$ ), respectively. The first two PCA  
416 axes explained 44.3% and 12.3 % of variation for body shape, 35.1% and 30.7 % of variation for  
417 head shape, and 39.6 % and 20.9 % for linear measurements (Fig. 5 d, e, f).

418

#### 419 **Discussion**

420 A common assumption in polymorphic species is that partitioning and variability of resource  
421 use will occur predominantly among morphs rather than within morphs. Homogeneity of  
422 resource use is anticipated to occur within morphs and represent selection for specialization  
423 (Amundsen et al. 2008; Knudsen et al. 2010; Svanbäck and Persson 2004). However, this study  
424 provided evidence that instead of homogeneity, variation occurred within a trophic morph due to  
425 individual specialization, possibly a precursor to further population diversification via fine scale  
426 ecological selection (Richardson et al. 2014; Vonlanthen et al. 2009). Based on dietary fatty  
427 acids, we identified four patterns of resource use within the piscivorous morph. Size-at-age did  
428 not explain observed variation in resource use within the piscivorous individuals, even though  
429 size-based trophic structure has been frequently observed in fishes (Layman et al. 2005;  
430 Mittelbach et al. 2014; Scharf et al. 2000; Svanbäck and Eklöv 2002; Wainwright et al. 1991).  
431 Feeding habits were also not linked with differences in morphology (except for minor variations  
432 linked to the caudal peduncle) nor were they related to differentiation based on neutral genetic  
433 markers, thereby suggesting that behavioral plasticity may cause the variation in resource use.  
434 Giant individuals as a sub-set displayed some genetic differentiation relative to other piscivorous  
435 lake trout in our analyses. The co-existence of multiple generalist morphs in Great Bear Lake,  
436 demonstrated by Chavarie et al. (2016b), combined with individual specialization shown herein  
437 within one of the generalist morphs identified previously, expands our understanding of niche  
438 expansion, plasticity, individual specialization, and intraspecific diversity in evolutionarily  
439 young populations.

440 Using fatty acids as dietary biomarkers, four distinct patterns of resource use were identified  
441 within the piscivorous lake trout of Great Bear Lake (Fig. 2). Groups 3 and 4 had the most  
442 overlap and these groups were characterized by C20 and C22 monounsaturates, biomarkers of a

443 food web based on pelagic or deep-water copepods (Ahlgren et al. 2009; Happel et al. 2017b;  
444 Hoffmann 2017; Loseto et al. 2009; Stowasser et al. 2006). Specifically, 20:1n-9 is associated  
445 with calanoid copepods known to be particularly important in northern pelagic food webs  
446 (Ahlgren et al. 2009; Budge et al. 2006; Kattner et al. 1998; Loseto et al. 2009). High levels of  
447 14:0, 18:3n-3 and 18:4n-3 fatty acids within groups 3 and 4 are also associated with pelagic  
448 environments (Scharnweber et al. 2016; Tucker et al. 2008), although high levels of 18:2n-6 and  
449 18:3n-3 have also been associated with terrestrial markers (Budge et al. 2001; Budge and Parrish  
450 1998; Hoffmann 2017). Groups 1 and 2 were characterized by higher concentrations of 16:4n-3,  
451 20:4n-6 and 22:6n-3 found in diatom and dinoflagellate-based food webs, respectively. The fatty  
452 acid 20:4n-6 reflects a benthic feeding strategy (from benthic invertebrates to fish) (Stowasser et  
453 al. 2006; Tucker et al. 2008), whereas 22:6n-3 in pennate diatoms (Iverson 2009) and filter  
454 feeders links planktonic dinoflagellates to benthic filter-feeding bivalves in a food web (Alfaro et  
455 al. 2006; Virtue et al. 2000). Relatively high concentrations of 16:0, 18:0 and 22:6n-3 and low  
456 concentrations of 16:1n-7 supported the interpretation of carnivorous (or cannibalistic) dietary  
457 patterns (Dalsgaard et al. 2003; Iverson 2009; Iverson et al. 2004; Piché et al. 2010). Individuals  
458 positioned between ends of principal components suggests a clinal pattern of resource use or  
459 habitat coupling (Vonlanthen et al. 2009), where borders among groups are neither abrupt nor  
460 obvious as they are part of a continuum (Hendry et al. 2009b). Overall, observed trophic patterns  
461 could reflect prey associated with different microhabitat patches; however, the key assumption of  
462 disparity of prey associated with habitat heterogeneity (Bolnick et al. 2010a; Chavarie et al.  
463 2016b; Collar et al. 2009; Skulason and Smith 1995; Svanbäck and Bolnick 2005) may not be  
464 applicable to Great Bear Lake (Chavarie et al. 2016b).

465 Sympatric divergence, in which barriers to gene flow are driven by selection between  
466 ecological niches, has been implicated in the evolution of ecological and morphological variation  
467 in fishes (Chavarie et al. 2016c; Harris et al. 2015; Hendry et al. 2007; Præbel et al. 2013;  
468 Schluter 1996). Despite the limited ability of neutral microsatellite markers to detect patterns of  
469 functional divergence (Berg et al. 2016; Lamichhaney et al. 2016; Roesti et al. 2015), the  
470 significant genetic differentiation based on comparisons with Giant sub-set suggests some  
471 deviation from panmixis within the piscivorous morph. Such a genetic pattern displayed by the  
472 Giant sub-set, despite a lack of ecological discreteness, perhaps resulted from size-assortative  
473 mating and/or differences in timing and location of spawning (Nagel and Schluter 1998; Rueger  
474 et al. 2016; Servedio et al. 2011). Great Bear Lake is not the only lake in North America with an  
475 apparent divergence in lake trout body size; in Lake Mistassini, “Giant” individuals also differed  
476 genetically from other lake trout groups (Marin et al. 2016). The similarity based on lake trout  
477 body size between both lakes suggests analogous variables favoring partial reproductive  
478 isolation. Although alternative causes of genetic differentiation may be possible, due to the short  
479 time since the onset of divergence post-zygotic isolation seems unlikely in this system (e.g.,  
480 prezygotic isolation generally evolves more rapidly Coyne and Orr 2004) and we therefore favor  
481 size and location assortative mating as an explanation for the low level genetic divergence  
482 observed. Nonetheless, putative partial reproductive isolation within a morph further adds to the  
483 complexity of diversification and speciation processes potentially occurring within lake trout in  
484 Great Bear Lake (Hendry 2009; Nosil et al. 2009).

485 A central question arising from our analysis is what are the mechanisms behind these  
486 patterns of variation? As individual specialization can result in dietary sub-groups and perhaps  
487 differences in habitat use among sections of a population, such inter-individual variation within

488 ecological sub-groups could have substantial influence on processes of diversification (Araújo et  
489 al. 2008; Cloyd and Eason 2016). Among-individual resource specialization within a morph in a  
490 species-poor ecosystem like Great Bear Lake could reflect the diversifying force of intraspecific  
491 competition, lack of constraining effects of interspecific competition, the abundance and  
492 distribution of space and food resources (e.g., temporal and spatial variation of resources), or  
493 some combination of these processes (Bolnick et al. 2007; Cloyd and Eason 2016;  
494 Winkelmann). Multiple patterns of resource specialization within a single lake trout morph in  
495 Great Bear Lake contrasts with the expected pattern of trophic divergence among morphs and  
496 homogenization in habitat use or diet within a morph, a key assumption guiding development of  
497 functional ecological theory (Svanbäck and Persson 2004; Violle et al. 2012). Expression of  
498 intraspecific divergence through habitat and foraging specialization is thought to drive selection  
499 on traits that enable more efficient use of resources (Schluter 2000; Skúlason and Smith 1995;  
500 Snorrason and Skúlason 2004).

501         In Great Bear Lake, multiple trophic generalists (which include piscivores studied herein)  
502 coexist with one specialist lake trout morph. This contrasts with the more commonly reported  
503 observation, the co-occurrence of multiple specialist morphs (Chavarie et al. 2016b; Elmer 2016;  
504 Kassen 2002). Apparent generalist population, however, can be composed of several subsets of  
505 specialized individuals that result in broad use of resources by the population (Bolnick and Paull  
506 2009; Bolnick et al. 2007; Bolnick et al. 2002; Bolnick et al. 2003; Chavarie et al. 2016a). This  
507 broad distribution of trophic variation within a population appears to be the case within the Great  
508 Bear Lake piscivorous morph. Among-individual specialization, reported in this study, may  
509 result from variable use of spatially separated resources and/or resources in different seasons and  
510 years (temporal variation), both of which could be expected in the depauperate environment of a

511 large northern lake (Fig. A4; Chavarie et al. 2016b; Costa et al. 2008; Cusa et al. 2019; Quevedo  
512 et al. 2009). Ecologically, among-individual resource specialization is another form of diversity  
513 that is contained within a morph (Araújo et al. 2008; Bolnick et al. 2003; Pires et al. 2011),  
514 which may increase stability and persistence of a morph within a system where energy resources  
515 are scarce and ephemeral, such as in Great Bear Lake (Cloyed and Eason 2016; Davies et al.  
516 2016; Okuyama 2008; Pfennig and Pfennig 2012; Smith et al. 2011). Whether among-individual  
517 resource use within this morph is stable or is an initial divergent step that with enough time will  
518 fully differentiate evolutionary units is a question that cannot be answered with our data.

519         Realized niche expansions are often linked to individuals of different morphologies and  
520 body sizes, with evidence of efficiency trade-offs among different resources (Cloyed and Eason  
521 2016; Parent et al. 2014; Roughgarden 1972; Svanbäck and Persson 2004). When a resource  
522 gradient exists, niche expansion can be achieved via genetic differentiation, phenotypic  
523 plasticity, or a combination of these processes (Parent et al. 2014). The apparent segregation of  
524 resource use based on fatty acid analyses, despite a lack of major morphological, body size, and  
525 neutral genetic differentiation among the four dietary groups within the piscivorous morph,  
526 suggests that behavioral plasticity in resource exploitation is causing the observed patterns of  
527 dietary differentiation. Plasticity may promote evolution of diversification by expanding the  
528 range of phenotypes on which selection can act (Nonaka et al. 2015; Pfennig et al. 2010; West-  
529 Eberhard 2003). Theoretical models suggest that exploiting a wide range of resources is either  
530 costly or limited by constraints, but plasticity is favored when 1) spatial and temporal variation  
531 of resources are important (i.e., highly present in Great Bear Lake; Fig. A4), 2) dispersal is high,  
532 3) environmental cues are reliable, 4) genetic variation for plasticity is high and 5) cost/limits of  
533 plasticity are low (Ackermann et al. 2004; Hendry 2016).

534           The expression of plasticity in response to particular ecological conditions (e.g., habitat  
535 structure, prey diversity) can be evolutionarily beneficial (i.e., result in increases in fitness).  
536 While most studies of diet variation focus on morphological differences among morphs in a  
537 population, diet variation can also arise from behavioral, biochemical, cognitive, and social-rank  
538 differences that cause functional ecology to be expressed at a finer scale rather than at the morph  
539 level (McGill et al. 2006; Svanbäck and Bolnick 2005; Violle et al. 2012; Zhao et al. 2014).  
540 Indeed, behavioral plasticity likely has a temporal evolutionary advantage relative to  
541 morphological plasticity due to relatively reduced reliance on ecologically beneficial structural  
542 and morphological adaptation (Smith et al. 2011; Svanbäck et al. 2009b). The only detectable  
543 morphological differences among the piscivorous groups in Great Bear Lake were associated  
544 with jaw lengths, snout-eye distance, and head length and depth, which are strongly related to  
545 foraging opportunities (Adams and Huntingford 2002; Sušnik et al. 2006; Wainwright and Price  
546 2016). Some morphological characters likely express different degrees of plastic responses  
547 (adaptive or not), and thus may be expressed differently depending on the magnitude and time of  
548 exposure to heterogeneous environments (Hendry 2016; Sharpe et al. 2008). For example,  
549 environmental components (e.g., habitat structure) appear to have stronger and faster effects on  
550 linear characters (e.g., jaw length) than on body shape (Chavarie et al. 2015; Sharpe et al. 2008).  
551 Trophic level might also limit the scope for morphological variation in lake trout because  
552 piscivory can limit diversification of feeding morphology in fishes (Collar et al. 2009; Svanbäck  
553 et al. 2015).

## 554 **Conclusion**

555 Understanding ecological mechanisms of diversification is a challenging aspect of evolutionary  
556 ecology (Ackermann et al. 2004). Diversification occurs along a continuum of differentiation and



557 in early stages, morphological and dietary differences may not always result from genetic  
558 divergence (Hendry 2016; Nosil et al. 2009). Considering that processes of speciation continue  
559 to be debated, disagreement on when intraspecific divergence starts and what processes are  
560 involved is not surprising (De Queiroz 2005, 2007; Venton 2017). The debate around  
561 diversification sequence, (which diverges first, behaviour, morphology, or ecology?) highlights  
562 the mosaic nature of speciation (Hendry et al. 2009a). In this study, we asked whether  
563 diversification could be occurring within a morph by examining the fine-scale trophic variation,  
564 at a presumed early stage of sympatric evolutionary divergence of lake trout in Great Bear Lake  
565 (i.e., postglacial, representing ~350 generations) (Harris et al. 2015). Rapid evolution in nature  
566 on an “ecological time scale”, within relatively few generations, has demonstrated that rapid  
567 differentiation can be a strong driver of population dynamics (Ashley et al. 2003; Fussmann et al.  
568 2007; Hendry 2016; Turcotte et al. 2011). Due to presumed homogeneity, few studies have  
569 investigated dietary patterns and groupings within a morph. However, in this study, we found  
570 evidence that among-individual resource specialization occurred within a piscivorous lake trout  
571 morph, with four different patterns of resource use identified by fatty acids composition of  
572 muscle tissue. These groups did not differ in depth of capture or life history parameters, showed  
573 a lack of morphological differentiation (i.e., except for caudal peduncle), and only the Giant sub-  
574 set was weakly genetically distinctive from others. The lack of non-neutral markers in the  
575 analyses may have prevented us from detecting multiple genetic populations. However, the  
576 trophic patterns shown within this morph suggested that ecological drivers (i.e., habitat use, prey  
577 diversity) could have important effects on plasticity expression and perhaps on initial or early  
578 stages of divergence. By focusing on a postglacial ecosystem, the confounding effects of time,  
579 which can influence (and obscure observation of) mechanisms of divergence (Seehausen and

580 Wagner 2014), were reduced in this study. But whether we have identified a stable  
581 polymorphism or the first step in diversification on a trajectory of divergence and speciation,  
582 remains unknown (Seehausen et al. 2008). Nonetheless, the observed trophic specialization  
583 within a morph, compared to the previously reported generality among morphs (Chavarie et al.  
584 2016b), suggests that individual specialization can occur within a trophic morph. Future research  
585 should focus on the role of among-individual differences within evolutionary units such as  
586 morphotypes.

587 **List of abbreviations:**

588 BP = before present

589 m = meter

590 mm = millimeter

591 h = hour

592 ca. = around

593 i.e., = stands for

594 e.g., = for example

595 NaCl = Sodium Chloride

596 FAME = fatty acid methyl esters

597 H<sub>2</sub>SO<sub>4</sub> = Sulfuric acid

598 GC = Gas chromatographic

599 °C = degree Celsius

600 °C/min = degree Celsius/minutes

601 UPGMA = Unweighted Pair Group Method with Arithmetic Mean

602 PCA = principal component analysis

603 PERMANOVA = Permutational Multivariate Analysis of Variance

604 MANOVA = Multivariate analysis of variance

605 SIMPER= similarity percentage routine

606 ANOSIM = analysis of similarities

607  $N$  =Number of individuals genotyped

608  $N_A$  = number of alleles

609  $H_E$ =expected heterozygosity

610  $H_O$  = observed heterozygosity

611  $A_R$ = allelic richness

612  $PA_R$  = private allelic richness

613  $A$  = alpha

614 FCA = Factorial correspondence analysis

615  $k$ =number of alleles

616 DAPC = Discriminant Analysis of Principal Components

617 IMP = Integrated Morphometrics Programs

618 CVA = Canonical Variate Analyses

619

## 620 **Acknowledgements**

621 We thank one anonymous reviewer and Alexandra Tyers for their insightful readings and  
622 constructive suggestions. We thank Déline Renewable Resources Council, Déline Lands and  
623 Finance Corporation, the community of Déline, DFO in Hay River, and the Department of  
624 Environment and Natural Resources in Déline provided valuable help with field planning and  
625 logistics. We especially thank J. Chavarie, S. Buckley, L. Harris, G. Lafferty, M. Lindsey, M.

626 Low, Z. Martin, S. Wiley, and C. Yukon, who helped lead sampling teams and coordinate  
627 logistics. The following individuals who helped conduct field sampling in various years are  
628 gratefully acknowledged: J. Baptiste, D. Betsidea, D. Baton, L. Dueck, R. Eshenroder, G.  
629 Menacho, N. Modeste, I. Neyelle, L. Neyelle, M. Smirle, A. Swietzer, C. Takazo, A. Vital, F.  
630 Vital, B. Yukon, M. Yukon, T. Yukon and Charity, Cameron, and Cyre Yukon. D. Phillibert, K.  
631 Laubriat, S. Thacker, and K. Theoret conducted isotopic lab work.

632 **Declarations:**

633 **Authors' contributions**

634 LC, KH, WT, CK, and AM conceived and funded the study. LC and CG carried out the field  
635 work. LC, CG, LH, and MH participated in the data analyses. LC wrote the manuscript. All  
636 authors read and approved the final manuscript.

637 **Competing interests**

638 The authors declare that they have no competing interests.

639 **Availability of data and materials**

640 The datasets supporting the conclusions of this article are included within the article. Raw data  
641 are available from the corresponding author upon reasonable request.

642 **Consent to publish**

643 Not applicable.

644 **Ethics approval and consent to participate**

645 We declare that our experiments were performed in the respect of ethical rules. This protocol  
646 was approved by Department of Fisheries and Ocean Canada, Freshwater Institute Animal Care  
647 Committee Science Laboratories.

## 648 **Funding**

649 Funds are from Fisheries and Oceans Canada (DFO), Northern Development Canada Northwest  
650 Territories Cumulative Impacts Monitoring Program grants, Sahtu Renewable Resource Board,  
651 and the Great Lakes Fishery Commission. Funding bodies had no role in the study design, in the  
652 collection, analysis and interpretation of data, in writing the manuscript or the decision to submit  
653 the paper for publication.

654

## 655 **Literature:**

- 656  
657 Ackermann, M., Doebeli, M., and Gomulkiewicz, R. 2004. Evolution of niche width and  
658 adaptive diversification. *Evolution* **58**(12): 2599-2612.
- 659 Adams, C.E., and Huntingford, F.A. 2002. The functional significance of inherited differences in  
660 feeding morphology in a sympatric polymorphic population of Arctic charr. *Evolutionary*  
661 *Ecology* **16**(1): 15-25.
- 662 Ahlgren, G., Vrede, T., and Goedkoop, W. 2009. Fatty Acid Ratios in Freshwater Fish,  
663 Zooplankton and Zoobenthos—Are There Specific Optima? *In* *Lipids in aquatic*  
664 *ecosystems*. Springer. pp. 147-178.
- 665 Alfaro, A.C., Thomas, F., Sergeant, L., and Duxbury, M. 2006. Identification of trophic  
666 interactions within an estuarine food web (northern New Zealand) using fatty acid  
667 biomarkers and stable isotopes. *Estuarine, Coastal and Shelf Science* **70**(1): 271-286.
- 668 Alfonso, N.R. 2004. Evidence for two morphotypes of lake charr, *Salvelinus namaycush*, from  
669 Great Bear Lake, Northwest Territories, Canada *Environmental Biology of Fishes* **71**: 21-  
670 32.
- 671 Amundsen, P.-A., Knudsen, R., and Klemetsen, A. 2008. Seasonal and ontogenetic variations in  
672 resource use by two sympatric Arctic charr morphs [journal article]. *Environmental*  
673 *Biology of Fishes* **83**(1): 45-55. doi:10.1007/s10641-007-9262-1.
- 674 Araújo, M.S., Guimarães, P.R., Svanbäck, R., Pinheiro, A., Guimarães, P., Reis, S.F.d., and  
675 Bolnick, D.I. 2008. Network analysis reveals contrasting effects of intraspecific  
676 competition on individual vs. population diets. *Ecology* **89**(7): 1981-1993.
- 677 Ashley, M.V., Willson, M.F., Pergams, O.R., O'Dowd, D.J., Gende, S.M., and Brown, J.S. 2003.  
678 Evolutionarily enlightened management. *Biological Conservation* **111**(2): 115-123.
- 679 Berg, P.R., Star, B., Pampoulie, C., Sodeland, M., Barth, J.M.I., Knutsen, H., Jakobsen, K.S.,  
680 and Jentoft, S. 2016. Three chromosomal rearrangements promote genomic divergence

- 681 between migratory and stationary ecotypes of Atlantic cod. *Scientific Reports* **6**: 23246.  
682 doi:10.1038/srep23246.
- 683 Bhat, S., Amundsen, P.-A., Knudsen, R., Gjelland, K.Ø., Fevolden, S.-E., Bernatchez, L., and  
684 Præbel, K. 2014. Speciation reversal in European whitefish (*Coregonus lavaretus* (L.))  
685 caused by competitor invasion. *PLoS One* **9**(3): e91208.
- 686 Bolnick, D.I., and Paull, J.S. 2009. Morphological and dietary differences between individuals  
687 are weakly but positively correlated within a population of threespine stickleback.  
688 *Evolutionary Ecology Research* **11**(8): 1217-1233.
- 689 Bolnick, D.I., Svanbäck, R., Araújo, M.S., and Persson, L. 2007. Comparative support for the  
690 niche variation hypothesis that more generalized populations also are more  
691 heterogeneous. *Proceedings of the National Academy of Sciences* **104**(24): 10075-10079.
- 692 Bolnick, D.I., Yang, L.H., Fordyce, J.A., Davis, J.M., and Svanbäck, R. 2002. Measuring  
693 individual-level resource specialization. *Ecology* **83**(10): 2936-2941. doi:10.1890/0012-  
694 9658(2002)083[2936:MILRS]2.0.CO;2.
- 695 Bolnick, D.I., Ingram, T., Stutz, W.E., Snowberg, L.K., Lau, O.L., and Paull, J.S. 2010a.  
696 Ecological release from interspecific competition leads to decoupled changes in  
697 population and individual niche width. *Proceedings of the Royal Society of London B:*  
698 *Biological Sciences* **277**(1689): 1789-1797. doi:10.1098/rspb.2010.0018.
- 699 Bolnick, D.I., Ingram, T., Stutz, W.E., Snowberg, L.K., Lau, O.L., and Paull, J.S. 2010b.  
700 Ecological release from interspecific competition leads to decoupled changes in  
701 population and individual niche width. *Proceedings of the Royal Society of London B:*  
702 *Biological Sciences*: rspb20100018.
- 703 Bolnick, D.I., Svanbäck, R., Fordyce, J.A., Yang, L.H., Davis, J.M., Hulsey, C.D., and Forister,  
704 M.L. 2003. The ecology of individuals: incidence and implications of individual  
705 specialization. *Am. Nat.* **161**(1): 1-28.
- 706 Budge, S., Parrish, C., and McKenzie, C. 2001. Fatty acid composition of phytoplankton, settling  
707 particulate matter and sediments at a sheltered bivalve aquaculture site. *Marine*  
708 *Chemistry* **76**(4): 285-303.
- 709 Budge, S.M., and Parrish, C.C. 1998. Lipid biogeochemistry of plankton, settling matter and  
710 sediments in Trinity Bay, Newfoundland. II. Fatty acids. *Organic Geochemistry* **29**(5):  
711 1547-1559.
- 712 Budge, S.M., Iverson, S.J., and Koopman, H.N. 2006. Studying trophic ecology in marine  
713 ecosystems using fatty acids: a primer on analysis and interpretation. *Marine Mammal*  
714 *Science* **22**(4): 759-801.
- 715 Chavarie, L., Howland, K.L., and Tonn, W.M. 2013. Sympatric polymorphism in lake trout: the  
716 coexistence of multiple shallow-water morphotypes in Great Bear Lake. *Transactions of*  
717 *the American Fisheries Society* **142**(3): 814-823. doi:10.1080/00028487.2013.763855.
- 718 Chavarie, L., Howland, K., Harris, L., and Tonn, W. 2015. Polymorphism in lake trout in Great  
719 Bear Lake: intra-lake morphological diversification at two spatial scales. *Biological*  
720 *Journal of the Linnean Society* **114**(1): 109-125.
- 721 Chavarie, L., Howland, K., Gallagher, C., and Tonn, W. 2016a. Fatty acid signatures and  
722 stomach contents of four sympatric Lake Trout: assessment of trophic patterns among  
723 morphotypes in Great Bear Lake. *Ecology of Freshwater Fish* **25**: 109-124.  
724 doi:10.1111/eff.12195.
- 725 Chavarie, L., Howland, K., Venturelli, P., Kissinger, B.C., Tallman, R., and Tonn, W. 2016 Life-  
726 history variation among four shallow-water morphotypes of lake trout from Great Bear

- 727 Lake, Canada. *Journal of Great Lakes Research*: DOI:10.1016/j.jglr.2015.1007.1006.  
728 doi:doi:10.1016/j.jglr.2015.07.006.
- 729 Chavarie, L., Harford, W.J., Howland, K.L., Fitzsimons, J., Muir, A.M., Krueger, C.C., and  
730 Tonn, W.M. 2016b. Multiple generalist morphs of Lake Trout: Avoiding constraints on  
731 the evolution of intraspecific divergence? *Ecology and Evolution* **6**: 7727–7741.
- 732 Chavarie, L., Muir, A.M., Zimmerman, M.S., Baillie, S.M., Hansen, M.J., Nate, N.A., Yule,  
733 D.L., Middel, T., Bentzen, P., and Krueger, C.C. 2016c. Challenge to the model of lake  
734 charr evolution: shallow- and deep-water morphs exist within a small postglacial lake.  
735 *Biological Journal of the Linnean Society*: n/a-n/a. doi:10.1111/bij.12913.
- 736 Cloyd, C.S., and Eason, P.K. 2016. Different ecological conditions support individual  
737 specialization in closely related, ecologically similar species. *Evolutionary Ecology*  
738 **30**(3): 379-400.
- 739 Collar, D.C., O'Meara, B.C., Wainwright, P.C., and Near, T.J. 2009. Piscivory Limits  
740 Diversification of Feeding Morphology in Centrarchid Fishes. *Evolution* **63**(6): 1557-  
741 1573. Available from <http://www.jstor.org/stable/40306233> [accessed].
- 742 Costa, G., xa, C, Mesquita, D., xa, O, Colli, G., xa, R, Vitt, L., xa, J, Associate Editor: Daniel,  
743 R., and Editor: Monica, G. 2008. Niche Expansion and the Niche Variation Hypothesis:  
744 Does the Degree of Individual Variation Increase in Depauperate Assemblages? *The*  
745 *American Naturalist* **172**(6): 868-877. doi:10.1086/592998.
- 746 Coyne, J.A., and Orr, H.A. 2004. *Speciation*. Sinauer Associates Sunderland, MA.
- 747 Cusa, M., Berge, J., and Varpe, Ø. 2019. Seasonal shifts in feeding patterns: Individual and  
748 population realized specialization in a high Arctic fish. *Ecology and Evolution* **0**(0).  
749 doi:10.1002/ece3.5615.
- 750 Dalsgaard, J., St. John, M., Kattner, G., Müller-Navarra, D., and Hagen, W. 2003. Fatty acid  
751 trophic markers in the pelagic marine environment. *In* *Advances in Marine Biology*.  
752 Academic Press. pp. 225-340.
- 753 Davies, T.J., Urban, M.C., Rayfield, B., Cadotte, M.W., and Peres-Neto, P.R. 2016.  
754 Deconstructing the relationships between phylogenetic diversity and ecology: a case  
755 study on ecosystem functioning. *Ecology* **97**(9): 2212-2222. doi:10.1002/ecy.1507.
- 756 De Jong, G. 2005. Evolution of phenotypic plasticity: patterns of plasticity and the emergence of  
757 ecotypes. *New Phytologist* **166**(1): 101-118.
- 758 De León, L.F., Rolshausen, G., Bermingham, E., Podos, J., and Hendry, A.P. 2012. Individual  
759 specialization and the seeds of adaptive radiation in Darwin's finches. *Evolutionary*  
760 *Ecology Research* **14**(4): 365-380.
- 761 De Queiroz, K. 2005. Ernst Mayr and the modern concept of species. *Proceedings of the*  
762 *National Academy of Sciences* **102**(suppl 1): 6600-6607.
- 763 De Queiroz, K. 2007. Species concepts and species delimitation. *Systematic biology* **56**(6): 879-  
764 886.
- 765 Duerksen, S.W., Thiemann, G.W., Budge, S.M., Poulin, M., Niemi, A., and Michel, C. 2014.  
766 Large, omega-3 rich, pelagic diatoms under Arctic sea ice: sources and implications for  
767 food webs. *PloS one* **9**(12): e114070.
- 768 Earl, D.A. 2012. STRUCTURE HARVESTER: a website and program for visualizing  
769 STRUCTURE output and implementing the Evanno method. *Conservation genetics*  
770 resources **4**(2): 359-361.

- 771 Elmer, K.R. 2016. Genomic tools for new insights to variation, adaptation, and evolution in the  
772 salmonid fishes: a perspective for charr [journal article]. *Hydrobiologia*:  
773 DOI:10.1007/s10750-10015-12614-10755. doi:10.1007/s10750-015-2614-5.
- 774 Eloranta, A.P., Siwertsson, A., Knudsen, R., and Amundsen, P.A. 2011. Dietary plasticity of  
775 Arctic charr (*Salvelinus alpinus*) facilitates coexistence with competitively superior  
776 European whitefish (*Coregonus lavaretus*). *Ecology of Freshwater Fish* **20**(4): 558-568.
- 777 Evanno, G., Regnaut, S., and Goudet, J. 2005. Detecting the number of clusters of individuals  
778 using the software STRUCTURE: a simulation study. *Molecular ecology* **14**(8): 2611-  
779 2620.
- 780 Excoffier, L., Laval, G., and Schneider, S. 2005. Arlequin (version 3.0): an integrated software  
781 package for population genetics data analysis. *Evolutionary bioinformatics* **1**: 47-50.
- 782 Folch, J., Lees, M., and Sloane-Stanley, G. 1957. A simple method for the isolation and  
783 purification of total lipids from animal tissues. *J Biol Chem* **226**(1): 497-509.
- 784 Fussmann, G.F., Loreau, M., and Abrams, P.A. 2007. Eco-evolutionary dynamics of  
785 communities and ecosystems. *Functional Ecology* **21**(3): 465-477. doi:10.1111/j.1365-  
786 2435.2007.01275.x.
- 787 Goudet, J. 1995. FSTAT (version 1.2): a computer program to calculate F-statistics. *Journal of*  
788 *heredity* **86**(6): 485-486.
- 789 Goudet, J., Raymond, M., de Meeüs, T., and Rousset, F. 1996. Testing Differentiation in Diploid  
790 Populations. *Genetics* **144**(4): 1933. Available from  
791 <http://www.genetics.org/content/144/4/1933.abstract> [accessed].
- 792 Hammer, Ø., Harper, D., and Ryan, P. 2001. Past: paleontological statistics software package for  
793 education and data analysis. *Palaeontologia Electronica* **4**: 1-9.
- 794 Handelsman, C.A., Broder, E.D., Dalton, C.M., Ruell, E.W., Myrick, C.A., Reznick, D.N., and  
795 Ghalambor, C.K. 2013. Predator-induced phenotypic plasticity in metabolism and rate of  
796 growth: rapid adaptation to a novel environment. *Integrative and comparative biology*  
797 **53**(6): 975-988.
- 798 Happel, A., Pattridge, R., Walsh, M., and Rinchar, J. 2017a. Assessing diet compositions of  
799 Lake Ontario predators using fatty acid profiles of prey fishes. *Journal of Great Lakes*  
800 *Research*. doi:<http://dx.doi.org/10.1016/j.jglr.2016.12.008>.
- 801 Happel, A., Stratton, L., Pattridge, R., Rinchar, J., and Czesny, S. 2016. Fatty-acid profiles of  
802 juvenile lake trout reflect experimental diets consisting of natural prey. *Freshwater*  
803 *Biology* **61**(9): 1466-1476. doi:10.1111/fwb.12786.
- 804 Happel, A., Jonas, J.L., McKenna, P., Rinchar, J., He, J.X., and Czesny, S.J. 2017b. Spatial  
805 Variability of Lake Trout Diets in Lakes Huron and Michigan Revealed by Stomach  
806 Content and Fatty Acid Profiles. *Canadian Journal of Fisheries and Aquatic Sciences*.  
807 doi:10.1139/cjfas-2016-0202.
- 808 Harris, L.N., Howland, K.L., Kowalchuk, M.W., Bajno, R., Lindsay, M.M., and Taylor, E.B.  
809 2013. Microsatellite and mtDNA analysis of lake trout, *Salvelinus namaycush*, from  
810 Great Bear Lake, Northwest Territories: impacts of historical and contemporary  
811 evolutionary forces on Arctic ecosystems. *Ecology and Evolution* **3**(1): 145-161.  
812 doi:10.1002/ece3.439.
- 813 Harris, L.N., Chavarie, L., Bajno, R., Howland, K.L., Wiley, S.H., Tonn, W.M., and Taylor, E.B.  
814 2015. Evolution and origin of sympatric shallow-water morphotypes of Lake Trout,  
815 *Salvelinus namaycush*, in Canada's Great Bear Lake [Original Article]. *Heredity* **114**(1):  
816 94-106. doi:10.1038/hdy.2014.74.



- 817 Hendry, A., Bolnick, D., Berner, D., and Peichel, C. 2009a. Along the speciation continuum in  
818 sticklebacks. *Journal of Fish Biology* **75**(8): 2000-2036.
- 819 Hendry, A.P. 2009. Ecological speciation! Or the lack thereof? This Perspective is based on the  
820 author's J.C. Stevenson Memorial Lecture delivered at the Canadian Conference for  
821 Fisheries Research in Halifax, Nova Scotia, January 2008. *Canadian Journal of Fisheries*  
822 *and Aquatic Sciences* **66**(8): 1383-1398. doi:10.1139/F09-074.
- 823 Hendry, A.P. 2016. Key questions on the role of phenotypic plasticity in eco-evolutionary  
824 dynamics. *Journal of Heredity* **107**: 25-41.
- 825 Hendry, A.P., Nosil, P., and Rieseberg, L.H. 2007. The speed of ecological speciation.  
826 *Functional Ecology* **21**(3): 455-464.
- 827 Hendry, A.P., Bolnick, D.I., Berner, D., and Peichel, C.L. 2009b. Along the speciation  
828 continuum in stickleback. *J Fish Biol* **75**. doi:10.1111/j.1095-8649.2009.02419.x.
- 829 Hoffmann, J.M. 2017. Investigating trophic ecology and dietary niche overlap among morphs of  
830 Lake Trout in Lake Superior. University of Waterloo.
- 831 Hosmer Jr, D.W., Lemeshow, S., and Sturdivant, R.X. 2000. Model building strategies and  
832 methods for logistic regression. *Applied Logistic Regression*, Third Edition: 89-151.
- 833 Howell, K.L., Pond, D.W., Billett, D.S., and Tyler, P.A. 2003. Feeding ecology of deep-sea  
834 seastars (Echinodermata: Asteroidea): a fatty-acid biomarker approach. *Marine Ecology*  
835 *Progress Series* **255**: 193-206.
- 836 Howland, K.L., Gallagher, C., Boguski, D., Chavarie, L., Reist, J., Rosenburg, B., and Wiley, S.  
837 2013. Variation in morphology, life history and ecology of cisco in Great Bear Lake,  
838 Northwest Territories, Canada. *Sci. Advis. Sec. Res. Doc.* . p. 40.
- 839 Hubisz, M.J., Falush, D., Stephens, M., and Pritchard, J.K. 2009. Inferring weak population  
840 structure with the assistance of sample group information. *Molecular ecology resources*  
841 **9**(5): 1322-1332.
- 842 Hudson, A.G., Lundsgaard-Hansen, B., Lucek, K., Vonlanthen, P., and Seehausen, O. 2016.  
843 Managing cryptic biodiversity: fine-scale intralacustrine speciation along a benthic  
844 gradient in Alpine whitefish (*Coregonus* spp.). *Evolutionary Applications*.
- 845 Husson, F., Josse, J., Le, S., and Mazet, J. 2012. FactoMineR: Multivariate Exploratory Data  
846 Analysis and Data Mining with R. . R package version 1.18.
- 847 Iverson, S.J. 2009. Tracing aquatic food webs using fatty acids: from qualitative indicators to  
848 quantitative determination. *In Lipids in Aquatic Ecosystems*. Springer. pp. 281-308.
- 849 Iverson, S.J., Field, C., Bowen, W.D., and Blanchard, W. 2004. Quantitative fatty acid signature  
850 analysis: a new method of estimating predator diets. *Ecological Monographs* **74**: 211-235.
- 851 Jakobsson, M., and Rosenberg, N.A. 2007. CLUMPP: a cluster matching and permutation  
852 program for dealing with label switching and multimodality in analysis of population  
853 structure. *Bioinformatics* **23**(14): 1801-1806.
- 854 Johnson, L. 1975. Distribution of fish species in Great Bear Lake, Northwest Territories, with  
855 reference to zooplankton, benthic invertebrates, and environmental conditions. *Journal of*  
856 *the Fisheries Research Board of Canada* **32**: 1989-2004.
- 857 Jombart, T. 2008. adegenet: a R package for the multivariate analysis of genetic markers.  
858 *Bioinformatics* **24**(11): 1403-1405.
- 859 Jombart, T., Devillard, S., and Balloux, F. 2010. Discriminant analysis of principal components:  
860 a new method for the analysis of genetically structured populations. *BMC genetics* **11**(1):  
861 94.

- 862 Kahilainen, K., Malinen, T., Tuomaala, A., and Lehtonen, H. 2004. Diel and seasonal habitat and  
863 food segregation of three sympatric *Coregonus lavaretus* forms in a subarctic lake.  
864 Journal of Fish Biology **64**(2): 418-434.
- 865 Kalinowski, S.T. 2005. hp-rare 1.0: a computer program for performing rarefaction on measures  
866 of allelic richness. Molecular Ecology Notes **5**(1): 187-189.
- 867 Kassen, R. 2002. The experimental evolution of specialists, generalists, and the maintenance of  
868 diversity. Journal of Evolutionary Biology **15**(2): 173-190. doi:10.1046/j.1420-  
869 9101.2002.00377.x.
- 870 Kattner, G., Hagen, W., Graeve, M., and Albers, C. 1998. Exceptional lipids and fatty acids in  
871 the pteropod *Clione limacina* (Gastropoda) from both polar oceans. Marine Chemistry  
872 **61**(3): 219-228.
- 873 Kavanagh, A.S., Cronin, M.A., Walton, M., and Rogan, E. 2010. Diet of the harbour seal (*Phoca  
874 vitulina vitulina*) in the west and south-west of Ireland. Journal of the Marine Biological  
875 Association of the United Kingdom **90**(08): 1517-1527.
- 876 King, J.R., and Jackson, D.A. 1999. Variable selection in large environmental data sets using  
877 principal components analysis. Environmetrics **10**(1): 67-77. doi:10.1002/(SICI)1099-  
878 095X(199901/02)10:1<67::AID-ENV336>3.0.CO;2-0.
- 879 Klemetsen, A. 2010. The charr problem revisited: exceptional phenotypic plasticity promotes  
880 ecological speciation in postglacial lakes. Freshwater Reviews **3**: 49-74. doi:10.1608/frj-  
881 3.1.3.
- 882 Knudsen, R., Primicerio, R., Amundsen, P.-A., and Klemetsen, A. 2010. Temporal stability of  
883 individual feeding specialization may promote speciation. Journal of Animal Ecology  
884 **79**(1): 161-168. doi:10.1111/j.1365-2656.2009.01625.x.
- 885 Kristjánsson, B.K., Skúlason, S., and Noakes, D.L.G. 2002. Morphological segregation of  
886 Icelandic threespine stickleback (*Gasterosteus aculeatus* L.). Biol J Linn Soc **76**.  
887 doi:10.1046/j.1095-8312.2002.00063.x.
- 888 Lamichhaney, S., Fan, G., Widemo, F., Gunnarsson, U., Thalmann, D.S., Hoepfner, M.P., Kerje,  
889 S., Gustafson, U., Shi, C., Zhang, H., Chen, W., Liang, X., Huang, L., Wang, J., Liang,  
890 E., Wu, Q., Lee, S.M.-Y., Xu, X., Hoglund, J., Liu, X., and Andersson, L. 2016.  
891 Structural genomic changes underlie alternative reproductive strategies in the ruff  
892 (*Philomachus pugnax*) [Letter]. Nat Genet **48**(1): 84-88. doi:10.1038/ng.3430  
893 <http://www.nature.com/ng/journal/v48/n1/abs/ng.3430.html#supplementary-information>.
- 894 Layman, C.A., Winemiller, K.O., Arrington, D.A., and Jepsen, D.B. 2005. Body size and trophic  
895 position in a diverse tropical food web. Ecology **86**(9): 2530-2535.
- 896 Loseto, L., Stern, G., Connelly, T., Deibel, D., Gemmill, B., Prokopowicz, A., Fortier, L., and  
897 Ferguson, S. 2009. Summer diet of beluga whales inferred by fatty acid analysis of the  
898 eastern Beaufort Sea food web. Journal of Experimental Marine Biology and Ecology  
899 **374**(1): 12-18.
- 900 MacDonald, D., Levy, D., Czarnecki, A., Low, G., and Richea, N. 2004. State of the aquatic  
901 knowledge of Great Bear Lake watershed. Report to Indian and Northern Affairs Canada.  
902 Water Resources Division, MacDonald Environmental Sciences, Nanaimo, British  
903 Columbia.
- 904 Marin, K., Coon, A., Carson, R., Debes, P.V., and Fraser, D.J. 2016. Striking Phenotypic  
905 Variation yet Low Genetic Differentiation in Sympatric Lake Trout (*Salvelinus  
906 namaycush*). PLoS ONE **11**(9): e0162325. doi:10.1371/journal.pone.0162325.

- 907 McCune, B., and Mefford, M. 2011. PC-ORD v. 6.255 beta. MjM Software. Gleneden Beach,  
908 Lincoln.
- 909 McGill, B.J., Enquist, B.J., Weiher, E., and Westoby, M. 2006. Rebuilding community ecology  
910 from functional traits. *Trends in Ecology & Evolution* **21**(4): 178-185.  
911 doi:<http://dx.doi.org/10.1016/j.tree.2006.02.002>.
- 912 Mittelbach, G.G., Ballew, N.G., and Kjelvik, M.K. 2014. Fish behavioral types and their  
913 ecological consequences. *Canadian Journal of Fisheries and Aquatic Sciences* **71**(6): 927-  
914 944.
- 915 Morrison, W.R., and Smith, L.M. 1964. Preparation of fatty acid methyl esters and  
916 dimethylacetals from lipids with boron fluoride–methanol. *Journal of lipid research* **5**(4):  
917 600-608.
- 918 Muir, A.M., Vecsei, P., and Krueger, C.C. 2012. A perspective on perspectives: a method toward  
919 reducing variation in digital shape analysis. *Transactions of the American Fisheries*  
920 *Society* **141**(4): 1161-1170. doi:10.1080/00028487.2012.685823.
- 921 Muir, A.M., Bronte, C.R., Zimmerman, M.S., Quinlan, H.R., Glase, J.D., and Krueger, C.C.  
922 2014. Ecomorphological diversity of Lake Charr *Salvelinus namaycush* at Isle Royale,  
923 Lake Superior. *Transactions of the American Fisheries Society* **143**(4): 972-987.
- 924 Nagel, L., and Schluter, D. 1998. Body size, natural selection, and speciation in sticklebacks.  
925 *Evolution*: 209-218.
- 926 Narum, S.R. 2006. Beyond Bonferroni: less conservative analyses for conservation genetics.  
927 *Conservation Genetics* **7**(5): 783-787.
- 928 Nonaka, E., Svanbäck, R., Thibert-Plante, X., Englund, G., and Brännström, Å. 2015.  
929 Mechanisms by Which Phenotypic Plasticity Affects Adaptive Divergence and  
930 Ecological Speciation. *Am. Nat.* **186**(5): 126–143.
- 931 Nosil, P., Harmon, L.J., and Seehausen, O. 2009. Ecological explanations for (incomplete)  
932 speciation. *Trends in ecology & evolution* **24**(3): 145-156.
- 933 Okuyama, T. 2008. Individual behavioral variation in predator–prey models [journal article].  
934 *Ecological Research* **23**(4): 665-671. doi:10.1007/s11284-007-0425-5.
- 935 Parent, C.E., Agashe, D., and Bolnick, D.I. 2014. Intraspecific competition reduces niche width  
936 in experimental populations. *Ecology and evolution* **4**(20): 3978-3990.
- 937 Pfennig, D.W., and Pfennig, K.S. 2012. Evolution's wedge: competition and the origins of  
938 diversity. No. 12. Univ of California Press.
- 939 Pfennig, D.W., Wund, M.A., Snell-Rood, E.C., Cruickshank, T., Schlichting, C.D., and Moczek,  
940 A.P. 2010. Phenotypic plasticity's impacts on diversification and speciation. *Trends in*  
941 *ecology & evolution* **25**(8): 459-467.
- 942 Piché, J., Iverson, S.J., Parrish, F.A., and Dollar, R. 2010. Characterization of forage fish and  
943 invertebrates in the northwestern Hawaiian Islands using fatty acid signatures: species  
944 and ecological groups. *Marine Ecology Progress Series* **418**: 1-15.  
945 doi:10.3354/meps08814.
- 946 Pielou, E.C. 2008. After the ice age: the return of life to glaciated North America. University of  
947 Chicago Press.
- 948 Pires, M.M., Guimarães, P.R., Araújo, M.S., Giaretta, A.A., Costa, J.C.L., and dos Reis, S.F.  
949 2011. The nested assembly of individual-resource networks. *Journal of Animal Ecology*  
950 **80**(4): 896-903. doi:10.1111/j.1365-2656.2011.01818.x.
- 951 Præbel, K., Knudsen, R., Siwertsson, A., Karhunen, M., Kahilainen, K.K., Ovaskainen, O.,  
952 Østbye, K., Peruzzi, S., Fevolden, S.E., and Amundsen, P.A. 2013. Ecological speciation

- 953 in postglacial European whitefish: rapid adaptive radiations into the littoral, pelagic, and  
954 profundal lake habitats. *Ecology and evolution* **3**(15): 4970-4986.
- 955 Pritchard, J.K., Stephens, M., and Donnelly, P. 2000. Inference of population structure using  
956 multilocus genotype data. *Genetics* **155**(2): 945-959.
- 957 Quevedo, M., Svanbäck, R., and Eklöv, P. 2009. Intrapopulation niche partitioning in a  
958 generalist predator limits food web connectivity. *Ecology* **90**(8): 2263-2274.  
959 doi:10.1890/07-1580.1.
- 960 Richardson, J.L., Urban, M.C., Bolnick, D.I., and Skelly, D.K. 2014. Microgeographic  
961 adaptation and the spatial scale of evolution. *Trends in ecology & evolution* **29**(3): 165-  
962 176.
- 963 Roesti, M., Kueng, B., Moser, D., and Berner, D. 2015. The genomics of ecological vicariance in  
964 threespine stickleback fish [Article]. **6**: 8767. doi:10.1038/ncomms9767  
965 [http://dharmasastra.live.cf.private.springer.com/articles/ncomms9767#supplementary-](http://dharmasastra.live.cf.private.springer.com/articles/ncomms9767#supplementary-information)  
966 [information.](http://dharmasastra.live.cf.private.springer.com/articles/ncomms9767#supplementary-information)
- 967 Ronconi, R., Koopman, H.N., McKinstry, C., Wong, S., and Westgate, A.J. 2010. Inter-annual  
968 variability in diet of non-breeding pelagic seabirds *Puffinus* spp. at migratory staging  
969 areas: evidence from stable isotopes and fatty acids. *Marine Ecology Progress Series* **419**:  
970 267-282.
- 971 Rosenberg, N.A. 2004. DISTRUCT: a program for the graphical display of population structure.  
972 *Molecular Ecology Notes* **4**(1): 137-138.
- 973 Roughgarden, J. 1972. Evolution of niche width. *American Naturalist*: 683-718.
- 974 Rousset, F. 2008. genepop'007: a complete reimplementation of the genepop software for  
975 Windows and Linux. *Molecular ecology resources* **8**(1): 103-106.
- 976 Rueger, T., Gardiner, N.M., and Jones, G.P. 2016. Size matters: male and female mate choice  
977 leads to size-assortative pairing in a coral reef cardinalfish. *Behavioral Ecology* **27**(6):  
978 1585-1591.
- 979 Ryman, N., and Palm, S. 2006. POWSIM: a computer program for assessing statistical power  
980 when testing for genetic differentiation. *Molecular Ecology Notes* **6**(3): 600-602.
- 981 Scharf, F.S., Juanes, F., and Rountree, R.A. 2000. Predator size-prey size relationships of marine  
982 fish predators: interspecific variation and effects of ontogeny and body size on trophic-  
983 niche breadth. *Marine Ecology Progress Series* **208**: 229-248.
- 984 Scharnweber, K., Strandberg, U., Karlsson, K., and Eklöv, P. 2016. Decrease of Population  
985 Divergence in Eurasian Perch (*Perca fluviatilis*) in Browning Waters: Role of Fatty Acids  
986 and Foraging Efficiency. *PloS one* **11**(9): e0162470.
- 987 Schluter, D. 1996. Ecological speciation in postglacial fishes. *Philosophical Transactions of the*  
988 *Royal Society of London B Biological Sciences* **351**: 807-814.
- 989 Schluter, D. 2000. *The ecology of adaptive radiation*. Oxford University Press, Oxford.
- 990 Seehausen, O., and Wagner, C.E. 2014. Speciation in freshwater fishes. *Annual Review of*  
991 *Ecology, Evolution, and Systematics* **45**: 621-651.
- 992 Seehausen, O.L.E., Takimoto, G., Roy, D., and Jokela, J. 2008. Speciation reversal and  
993 biodiversity dynamics with hybridization in changing environments. *Molecular Ecology*  
994 **17**(1): 30-44. doi:10.1111/j.1365-294X.2007.03529.x.
- 995 Servedio, M.R., Doorn, G.S.V., Kopp, M., Frame, A.M., and Nosil, P. 2011. Magic traits in  
996 speciation: 'magic' but not rare? *Trends in Ecology & Evolution* **26**(8): 389-397.  
997 doi:<http://dx.doi.org/10.1016/j.tree.2011.04.005>.

- 998 Sharpe, D.M., Räsänen, K., Berner, D., and Hendry, A.P. 2008. Genetic and environmental  
999 contributions to the morphology of lake and stream stickleback: implications for gene  
1000 flow and reproductive isolation. *Evolutionary Ecology Research* **10**(6): 849-866.
- 1001 Skúlason, S., and Smith, T.B. 1995. Resource polymorphisms in vertebrates. *Trends in Ecology  
1002 & Evolution* **10**(9): 366-370.
- 1003 Skúlason, S., Snorrason, S.S., and Jonsson, B. 1999. Sympatric morphs, populations and  
1004 speciation in freshwater fish with emphasis on arctic charr. *In* *Evolution of biological  
1005 diversity. Edited by A.E. Magurran and R.M. May. Oxford University Press, London. p.  
1006 329.*
- 1007 Smith, J., Baumgartner, L., Suthers, I., and Taylor, M. 2011. Generalist niche, specialist strategy:  
1008 the diet of an Australian percichthyid. *Journal of Fish Biology* **78**(4): 1183-1199.
- 1009 Snorrason, S.S., and Skúlason, S. 2004. Adaptive speciation in northern freshwater fishes.  
1010 Adaptive speciation. Cambridge University Press, Cambridge: 210-228.
- 1011 Stowasser, G., Pierce, G.J., Moffat, C.F., Collins, M.A., and Forsythe, J.W. 2006. Experimental  
1012 study on the effect of diet on fatty acid and stable isotope profiles of the squid  
1013 *Lolliguncula brevis*. *Journal of Experimental Marine Biology and Ecology* **333**(1): 97-  
1014 114.
- 1015 Sušnik, S., Knizhin, I., Snoj, A., and Weiss, S. 2006. Genetic and morphological characterization  
1016 of a Lake Ohrid endemic, *Salmo* (*Acantholingua*) *ohridanus* with a comparison to  
1017 sympatric *Salmo trutta*. *Journal of Fish Biology* **68**(A): 2-23. doi:10.1111/j.0022-  
1018 1112.2006.00902.x.
- 1019 Svanbäck, R., and Eklöv, P. 2002. Effects of habitat and food resources on morphology and  
1020 ontogenetic growth trajectories in perch. *Oecologia* **131**(1): 61-70.
- 1021 Svanbäck, R., and Persson, L. 2004. Individual diet specialization, niche width and population  
1022 dynamics: implications for trophic polymorphisms. *Journal of Animal Ecology* **73**(5):  
1023 973-982.
- 1024 Svanbäck, R., and Bolnick, D.I. 2005. Intraspecific competition affects the strength of individual  
1025 specialization: an optimal diet theory method. *Evolutionary Ecology Research* **7**(7): 993-  
1026 1012.
- 1027 Svanbäck, R., and Schluter, D. 2012. Niche specialization influences adaptive phenotypic  
1028 plasticity in the threespine stickleback. *The American Naturalist* **180**(1): 50-59.
- 1029 Svanbäck, R., Pineda-Krch, M., and Doebeli, M. 2009a. Fluctuating population dynamics  
1030 promotes the evolution of phenotypic plasticity. *Am Nat* **174**(2): 176-189.
- 1031 Svanbäck, R., Quevedo, M., Olsson, J., and Eklöv, P. 2015. Individuals in food webs: the  
1032 relationships between trophic position, omnivory and among-individual diet variation.  
1033 *Oecologia* **178**(1): 103-114.
- 1034 Svanbäck, R., Mario Pineda-Krch, a.M.D., Krch, M., Doebeli, M., Associate Editor: Claire de,  
1035 M., and Editor: Donald, L.D. 2009b. Fluctuating Population Dynamics Promotes the  
1036 Evolution of Phenotypic Plasticity. *Am. Nat.* **174**(2): 176-189. doi:10.1086/600112.
- 1037 Team, R.C. 2015. R: a language and environment for statistical computing. Vienna, Austria;  
1038 2015.
- 1039 Team, R.C. 2017. R: A language and environment for statistical computing. R Foundation for  
1040 Statistical Computing. <http://www.R-project.org>, Vienna, Austria.
- 1041 Tucker, S., Bowen, W.D., and Iverson, S.J. 2008. Convergence of diet estimates derived from  
1042 fatty acids and stable isotopes within individual grey seals. *Marine Ecology Progress  
1043 Series* **354**: 267.

- 1044 Turcotte, M.M., Reznick, D.N., and Hare, J.D. 2011. The impact of rapid evolution on  
1045 population dynamics in the wild: experimental test of eco-evolutionary dynamics.  
1046 Ecology letters **14**(11): 1084-1092.
- 1047 Van Kleunen, M., and Fischer, M. 2005. Constraints on the evolution of adaptive phenotypic  
1048 plasticity in plants. New Phytologist **166**(1): 49-60.
- 1049 Van Oosterhout, C., Hutchinson, W.F., Wills, D.P., and Shipley, P. 2004. MICRO-CHECKER:  
1050 software for identifying and correcting genotyping errors in microsatellite data.  
1051 Molecular Ecology Notes **4**(3): 535-538.
- 1052 Venton, D. 2017. Highlight: Applying the Biological Species Concept across All of Life.  
1053 Genome biology and evolution **9**(3): 502.
- 1054 Violle, C., Enquist, B.J., McGill, B.J., Jiang, L., Albert, C.H., Hulshof, C., Jung, V., and Messier,  
1055 J. 2012. The return of the variance: intraspecific variability in community ecology.  
1056 Trends in ecology & evolution **27**(4): 244-252.
- 1057 Virtue, P., Mayzaud, P., Albessard, E., and Nichols, P. 2000. Use of fatty acids as dietary  
1058 indicators in northern krill, *Meganyctiphanes norvegica*, from northeastern Atlantic,  
1059 Kattegat, and Mediterranean waters. Canadian Journal of Fisheries and Aquatic Sciences  
1060 **57**(S3): 104-114.
- 1061 Vonlanthen, P., Roy, D., Hudson, A.G., LargiadÈR, C.R., Bittner, D., and Seehausen, O. 2009.  
1062 Divergence along a steep ecological gradient in lake whitefish (*Coregonus* sp.). Journal  
1063 of Evolutionary Biology **22**(3): 498-514. doi:10.1111/j.1420-9101.2008.01670.x.
- 1064 Wainwright, P.C., and Price, S.A. 2016. The Impact of Organismal Innovation on Functional and  
1065 Ecological Diversification. Integrative and Comparative Biology **56**(3): 479-488.  
1066 doi:10.1093/icb/icw081.
- 1067 Wainwright, P.C., Osenberg, C.W., and Mittelbach, G.G. 1991. Trophic Polymorphism in the  
1068 Pumpkinseed Sunfish (*Lepomis gibbosus* Linnaeus): Effects of Environment on  
1069 Ontogeny. Functional Ecology **5**(1): 40-55. doi:10.2307/2389554.
- 1070 Webb, P.W. 1984. Body form, locomotion and foraging in aquatic vertebrates. American  
1071 Zoologist **24**: 107-120.
- 1072 Weir, B.S., and Cockerham, C.C. 1984. Estimating F-statistics for the analysis of population  
1073 structure. evolution: 1358-1370.
- 1074 West-Eberhard, M.J. 2003. Developmental plasticity and evolution. Oxford University Press.
- 1075 Winkelmann, K. Competition-driven speciation in cichlid fish. Nature communications **5**: 3.  
1076 doi:10.1038/ncomms4412.
- 1077 Woo, K.J., Elliott, K.H., Davidson, M., Gaston, A.J., and Davoren, G.K. 2008. Individual  
1078 specialization in diet by a generalist marine predator reflects specialization in foraging  
1079 behaviour. Journal of Animal Ecology **77**(6): 1082-1091.
- 1080 Zelditch, M.L., Swiderski, D.L., and Sheets, H.D. 2012. Geometric morphometrics for  
1081 biologists: a primer. Academic Press.
- 1082 Zhao, T., Villéger, S., Lek, S., and Cucherousset, J. 2014. High intraspecific variability in the  
1083 functional niche of a predator is associated with ontogenetic shift and individual  
1084 specialization. Ecology and evolution **4**(24): 4649.
- 1085 Zimmerman, M.S., Krueger, C.C., and Eshenroder, R.L. 2006. Phenotypic diversity of lake trout  
1086 in Great Slave Lake: differences in morphology, buoyancy, and habitat depth.  
1087 Transactions of the American Fisheries Society **135**: 1056-1067.

1088 Zimmerman, M.S., Krueger, C.C., and Eshenroder, R.L. 2007. Morphological and ecological  
1089 differences between shallow- and deep-water lake trout in Lake Mistassini, Quebec.  
1090 *Journal of Great Lakes Research* **33**: 156-169.  
1091

1084 Table 1. Mean composition ( $\pm$ SD) of the 41 fatty acids profile (%) for the Group 1, Group 2,  
 1085 Group 3, and Group 4 of piscivorous Lake Trout morph identified from Great Bear Lake.

| <b>Fatty acids</b> | <b>Group 1</b> | <b>Group 2</b>  | <b>Group 3</b> | <b>Group 4</b> |
|--------------------|----------------|-----------------|----------------|----------------|
| 14:0               | 6.8 $\pm$ 1.0  | 7.0 $\pm$ 1.0   | 9.2 $\pm$ 1.0  | 9.9 $\pm$ 1.1  |
| 16:0               | 28.1 $\pm$ 1.0 | 28.13 $\pm$ 1.7 | 24.2 $\pm$ 1.7 | 26.1 $\pm$ 1.2 |
| 16:1n-7            | 15.9 $\pm$ 3.7 | 10.1 $\pm$ 2.0  | 19.5 $\pm$ 3.4 | 15.6 $\pm$ 2.1 |
| 16:2n-6            | 2.0 $\pm$ 0.5  | 2.4 $\pm$ 0.6   | 2.6 $\pm$ 0.2  | 3.1 $\pm$ 0.2  |
| 16:2n-4            | 2.6 $\pm$ 0.7  | 1.5 $\pm$ 0.4   | 2.7 $\pm$ 0.9  | 2.3 $\pm$ 0.4  |
| 17:0               | 2.7 $\pm$ 0.5  | 2.8 $\pm$ 0.3   | 2.4 $\pm$ 0.4  | 2.8 $\pm$ 0.2  |
| 16:3n-4            | 1.5 $\pm$ 0.7  | 1.4 $\pm$ 0.5   | 1.9 $\pm$ 0.6  | 1.8 $\pm$ 0.9  |
| 16:4n-3            | 2.6 $\pm$ 1.2  | 0.8 $\pm$ 0.3   | 1.3 $\pm$ 0.6  | 1.2 $\pm$ 0.4  |
| 16:4n-1            | 1.6 $\pm$ 0.7  | 1.5 $\pm$ 0.8   | 0.9 $\pm$ 0.6  | 1.0 $\pm$ 0.6  |
| 18:0               | 14.2 $\pm$ 1.6 | 13.1 $\pm$ 0.8  | 11.6 $\pm$ 0.7 | 11.7 $\pm$ 0.5 |
| 18:1n-9            | 20.6 $\pm$ 4.1 | 18.5 $\pm$ 3.4  | 32.3 $\pm$ 3.9 | 27.9 $\pm$ 3.5 |
| 18:1n-7            | 11.9 $\pm$ 2.4 | 9.5 $\pm$ 1.0   | 13.9 $\pm$ 1.2 | 12.5 $\pm$ 0.8 |
| 18:2n-6            | 8.6 $\pm$ 1.5  | 9.2 $\pm$ 1.6   | 12.4 $\pm$ 1.2 | 12.9 $\pm$ 1.0 |
| 18:2n-4            | 2.0 $\pm$ 0.4  | 1.5 $\pm$ 0.2   | 2.1 $\pm$ 0.2  | 2.1 $\pm$ 0.2  |
| 18:3n-6            | 2.2 $\pm$ 0.8  | 1.5 $\pm$ 0.4   | 2.5 $\pm$ 0.4  | 2.3 $\pm$ 0.2  |
| 18:3n-4            | 2.2 $\pm$ 0.7  | 1.5 $\pm$ 0.3   | 2.4 $\pm$ 0.4  | 2.0 $\pm$ 0.3  |
| 18:3n-3            | 6.6 $\pm$ 1.4  | 6.9 $\pm$ 0.9   | 7.9 $\pm$ 0.6  | 8.7 $\pm$ 0.7  |
| 18:3n-1            | 1.2 $\pm$ 0.7  | 1.2 $\pm$ 0.3   | 1.1 $\pm$ 0.3  | 1.5 $\pm$ 0.3  |
| 18:4n-3            | 3.5 $\pm$ 0.7  | 4.0 $\pm$ 1.2   | 4.9 $\pm$ 0.7  | 5.6 $\pm$ 0.7  |
| 18:4n-1            | 1.3 $\pm$ 0.6  | 0.4 $\pm$ 0.5   | 0.9 $\pm$ 0.5  | 1.2 $\pm$ 0.6  |
| 20:0               | 2.1 $\pm$ 0.7  | 2.8 $\pm$ 0.7   | 3.1 $\pm$ 0.6  | 2.8 $\pm$ 0.8  |
| 20:1n-11           | 1.7 $\pm$ 1.0  | 0.8 $\pm$ 0.5   | 1.9 $\pm$ 0.8  | 1.4 $\pm$ 0.4  |
| 20:1n-9            | 6.0 $\pm$ 1.4  | 4.2 $\pm$ 0.8   | 7.9 $\pm$ 0.9  | 7.1 $\pm$ 0.9  |
| 20:1n-7            | 2.5 $\pm$ 0.4  | 2.5 $\pm$ 0.3   | 3.8 $\pm$ 0.4  | 4.1 $\pm$ 0.6  |
| 20:2n-9            | 0.8 $\pm$ 0.6  | 1.4 $\pm$ 0.8   | 1.3 $\pm$ 0.4  | 1.2 $\pm$ 0.4  |
| 20:2n-6            | 3.8 $\pm$ 0.9  | 4.7 $\pm$ 0.9   | 6.8 $\pm$ 1.3  | 7.5 $\pm$ 1.0  |
| 20:3n-6            | 3.4 $\pm$ 0.5  | 3.6 $\pm$ 0.4   | 4.4 $\pm$ 0.5  | 4.0 $\pm$ 0.4  |
| 20:4n-6            | 13.8 $\pm$ 1.7 | 14.2 $\pm$ 1.3  | 10.1 $\pm$ 1.1 | 10.0 $\pm$ 1.2 |
| 20:3n-3            | 3.5 $\pm$ 0.7  | 4.5 $\pm$ 0.9   | 5.1 $\pm$ 0.6  | 6.6 $\pm$ 0.7  |
| 20:4n-3            | 6.1 $\pm$ 1.2  | 8.2 $\pm$ 1.3   | 8.8 $\pm$ 1.1  | 10.8 $\pm$ 0.9 |
| 20:5n-3            | 18.0 $\pm$ 2.9 | 15.7 $\pm$ 1.2  | 11.8 $\pm$ 2.1 | 12.2 $\pm$ 1.8 |
| 22:1n-11           | 1.8 $\pm$ 1.7  | 0.9 $\pm$ 0.5   | 1.0 $\pm$ 1.3  | 0.9 $\pm$ 0.4  |
| 22:1n-9            | 2.2 $\pm$ 0.5  | 2.4 $\pm$ 0.4   | 3.3 $\pm$ 0.4  | 3.1 $\pm$ 0.4  |
| 22:1n-7            | 1.2 $\pm$ 0.6  | 1.0 $\pm$ 0.5   | 1.1 $\pm$ 0.3  | 1.6 $\pm$ 0.4  |
| 22:2n-6            | 1.4 $\pm$ 0.5  | 1.7 $\pm$ 0.6   | 3.0 $\pm$ 0.5  | 4.0 $\pm$ 0.8  |
| 21:5n-3            | 0.9 $\pm$ 0.6  | 1.8 $\pm$ 0.6   | 2.2 $\pm$ 0.6  | 1.6 $\pm$ 0.9  |
| 22:4n-6            | 0.2 $\pm$ 0.5  | 1.0 $\pm$ 1.6   | 0.3 $\pm$ 0.6  | 1.6 $\pm$ 1.7  |
| 22:5n-6            | 7.6 $\pm$ 1.1  | 10.7 $\pm$ 1.4  | 7.7 $\pm$ 0.7  | 9.6 $\pm$ 1.4  |
| 22:4n-3            | 2.3 $\pm$ 0.9  | 4.2 $\pm$ 1.3   | 5.1 $\pm$ 0.9  | 7.2 $\pm$ 1.7  |
| 22:5n-3            | 10.4 $\pm$ 0.9 | 10.8 $\pm$ 0.6  | 10.4 $\pm$ 2.4 | 11.1 $\pm$ 0.7 |
| 22:6n-3            | 33.9 $\pm$ 5.6 | 38.9 $\pm$ 4.3  | 23.1 $\pm$ 3.7 | 26.3 $\pm$ 4.7 |



1086 Table 2. Number of individuals genotyped ( $N$ ), number of alleles ( $N_A$ ), expected heterozygosity  
1087 ( $H_E$ ), observed heterozygosity ( $H_O$ ), allelic richness ( $A_R$ ) and private allelic richness ( $PA_R$ ) within  
1088 fatty acid groups identified within a piscivorous morphotype of Lake Trout from Canada's Great  
1089 Bear Lake.

|                | <b>N</b> | <b>N<sub>A</sub></b> | <b>H<sub>E</sub></b> | <b>H<sub>O</sub></b> | <b>A<sub>R</sub></b> | <b>PA<sub>R</sub></b> |
|----------------|----------|----------------------|----------------------|----------------------|----------------------|-----------------------|
| <b>Group 1</b> | 12       | 10.16                | 0.85                 | 0.83                 | 9.87                 | 1.08                  |
| <b>Group 2</b> | 16       | 11.26                | 0.84                 | 0.82                 | 9.57                 | 0.99                  |
| <b>Group 3</b> | 20       | 12.32                | 0.84                 | 0.81                 | 9.70                 | 0.87                  |
| <b>Group 4</b> | 28       | 14.11                | 0.84                 | 0.81                 | 9.57                 | 0.98                  |
| <b>Giant</b>   | 39       | 15.95                | 0.84                 | 0.78                 | 9.69                 | 1.05                  |

1090

1091

1092 Table 3. Pairwise  $F_{ST}$  based on variation at microsatellite loci among Lake Trout morphs from  
 1093 Harris et al. (2015) and piscivorous fatty acids dietary groups from Great Bear Lake. Significant  
 1094 results are represented as follow: \* values are significant at an initial  $\alpha$  of 0.05 and \*\* values are  
 1095 significant at an  $\alpha$  of 0.02 subsequent False Discovery Rate adjustments for multiple  
 1096 comparisons.

|                | <b>Morph 1</b> | <b>Morph 2</b> | <b>Morph 3</b> |                | <b>Group 1</b> | <b>Group 2</b> | <b>Group 3</b> | <b>Group 4</b> |
|----------------|----------------|----------------|----------------|----------------|----------------|----------------|----------------|----------------|
| <b>Morph 1</b> |                |                |                | <b>Group 1</b> |                |                |                |                |
| <b>Morph 2</b> | 0.063**        |                |                | <b>Group 2</b> | 0.003          |                |                |                |
| <b>Morph 3</b> | 0.004**        | 0.007**        |                | <b>Group 3</b> | 0.001          | -0.01          |                |                |
| <b>Morph 4</b> | 0.012**        | 0.017**        | 0.009**        | <b>Group 4</b> | 0.005          | -0.004         | -0.002         |                |
|                |                |                |                | <b>Giant</b>   | 0.016**        | 0.001          | -0.002         | 0.006**        |

1097

1098 **List of Figures:**

1099 Fig. 1. Example of a piscivorous (64 cm) and a Giant (100 cm standard length) Lake Trout,  
1100 respectively, from Great Bear Lake (NT).

1101 Fig. 2. Principal Component Analysis of fatty acids of 79 individual Lake Trout classified as  
1102 piscivorous morph from Great Bear Lake, based on the most discriminating 26 fatty acids from  
1103 SIMPER analysis, explaining together ~89% of the separation among groups. A) Vectors of  
1104 individual fatty acids contributing to the positioning of piscivorous individuals and the convex  
1105 hull delimitating group's position are shown. B) Individual Lake Trout are represented as circle  
1106 = Group 1, square = Group 2, triangle = Group 3, and diamond = Group 4. To visualize their  
1107 variation within and among groups, large symbols were used to depict individuals longer than  
1108 900 mm fork length, which were identified as the Giant sub-set in this study. Groups were  
1109 defined by FactoMineR using fatty acids and they are outlined by convex hulls.

1110 Fig. 3. Fork length (mm) at age (years) for four piscivorous groups of Lake Trout sampled from  
1111 Great Bear Lake in 2002–2015 (Group 1 = squares; Group 2 = circles; Group 3 = triangles;  
1112 diamond = Group 4). Large symbols depict Giants (FL > 900 mm) within each group. The von  
1113 Bertalanffy length-age model is depicted as a solid line without Giants and a dashed line with  
1114 Giants.

1115 Fig. 4. Results of the Bayesian clustering analysis implemented in the program STRUCTURE  
1116 (B) and the compoplot of percent membership assignment revealed from the DAPC analysis (B)  
1117 for piscivorous Lake Trout from Great Bear Lake. Shown is the admixture coefficient/percent  
1118 membership assignment plot where each individual is represented as a vertical line partitioned  
1119 into colored segments representative of an individual's fractional membership in any given  
1120 cluster (K). The most likely number of genetic clusters was two in both the STRUCTURE

1121 analysis (based on  $\ln P[D]$  and the  $\Delta K$  statistic of Evanno et al. (2005)) and DAPC analysis (  
1122 based on the lowest BIC score and with 30 PCs retained.

1123 Fig. 5. Canonical Variate Analyses (95% ellipses) and Principal Component Analysis of body  
1124 shape (a, d), head shape (b, e) and linear measurements (c, f), respectively, of piscivorous Lake  
1125 Trout represented as: square = Group 1, circle = Group 2, triangle = Group 3, and diamond =  
1126 Group 4. The first two PCA axes explained 44.3% and 12.3 % of variation for body shape,  
1127 35.1% and 30.7 % of variation for head shape, and 39.6 % and 20.9 % for linear measurements  
1128 (Fig. 6 d, e, f). To visualize their variation within and among groups, larger symbols were used to  
1129 depict individuals longer than 900 mm FL, which are considered the Giant sub-set in this study.

1130 Fig. 6. Residuals of mean ( $\pm$  95%CI) size-standardized upper and lower jaw lengths, head depth  
1131 and length, and snout-eye length among piscivorous Lake Trout groups. Grouping symbols are  
1132 as follow: square = Group 1, circle = Group 2, triangle = Group 3, and diamond = Group 4.

1133

1134

1135

1136

1137

1138

1139

1140

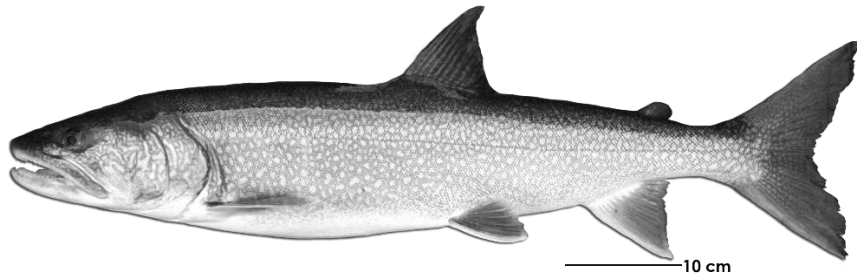

1141

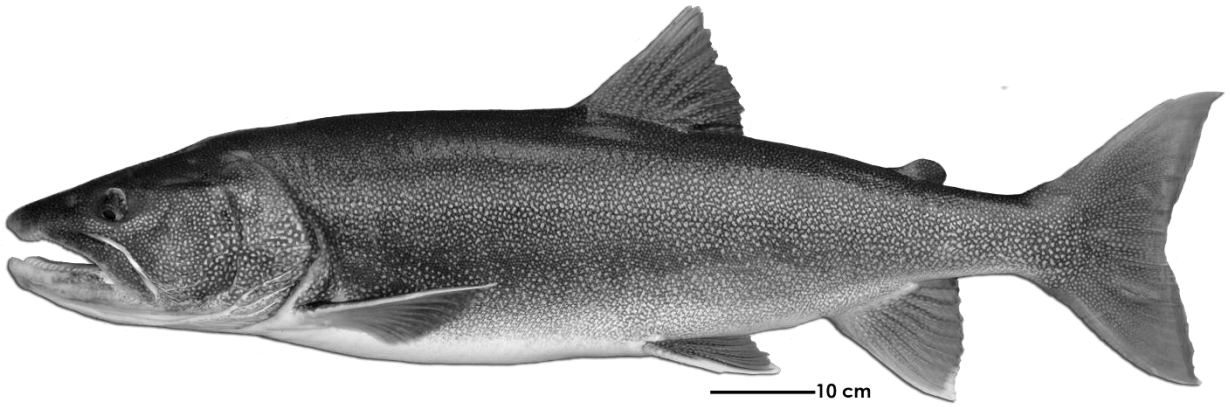

1142

1143

1144

1145 Fig. 1.

1146

1147

1148

1149

1150

1151

1152

1153

1154

1155

1156

1157

1158

1159

1160

1161

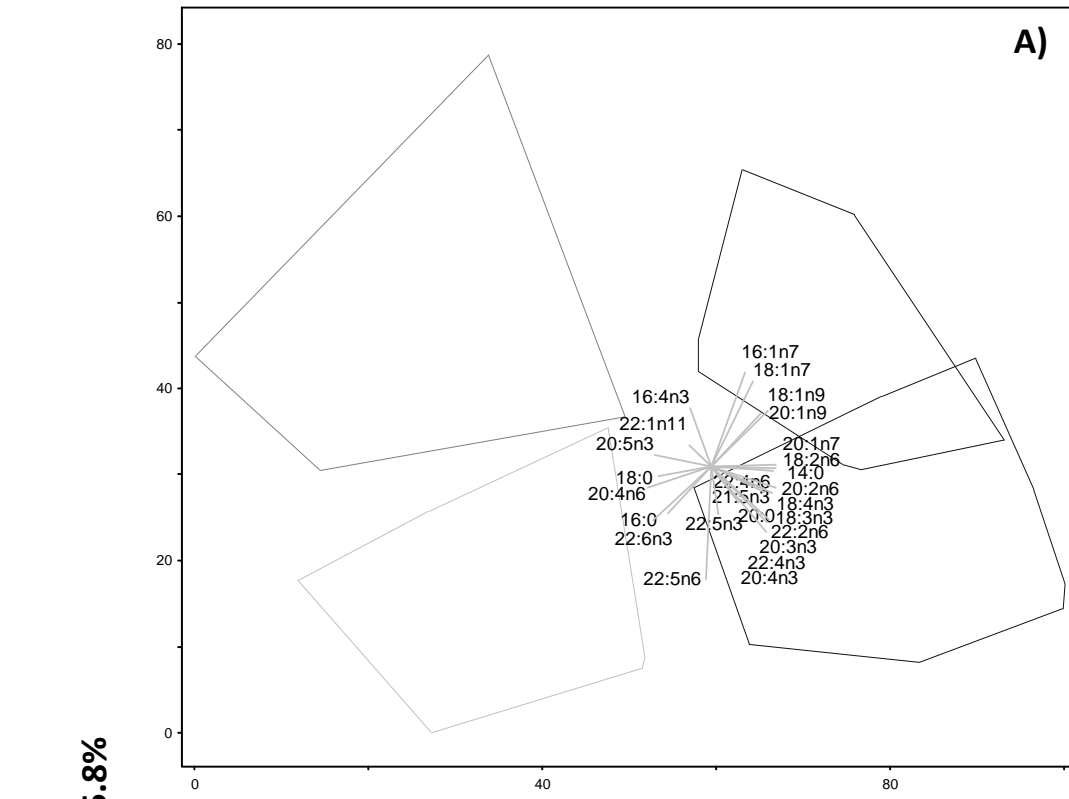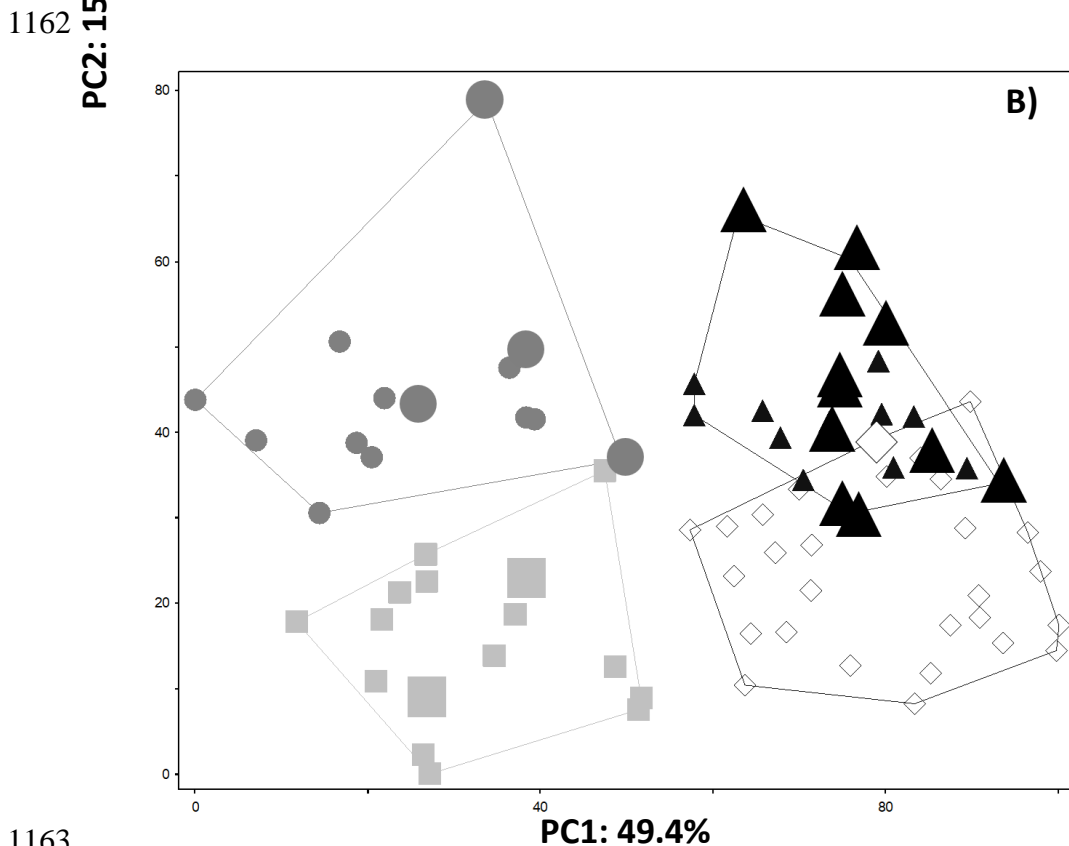

1163  
1164 Fig. 2

1165

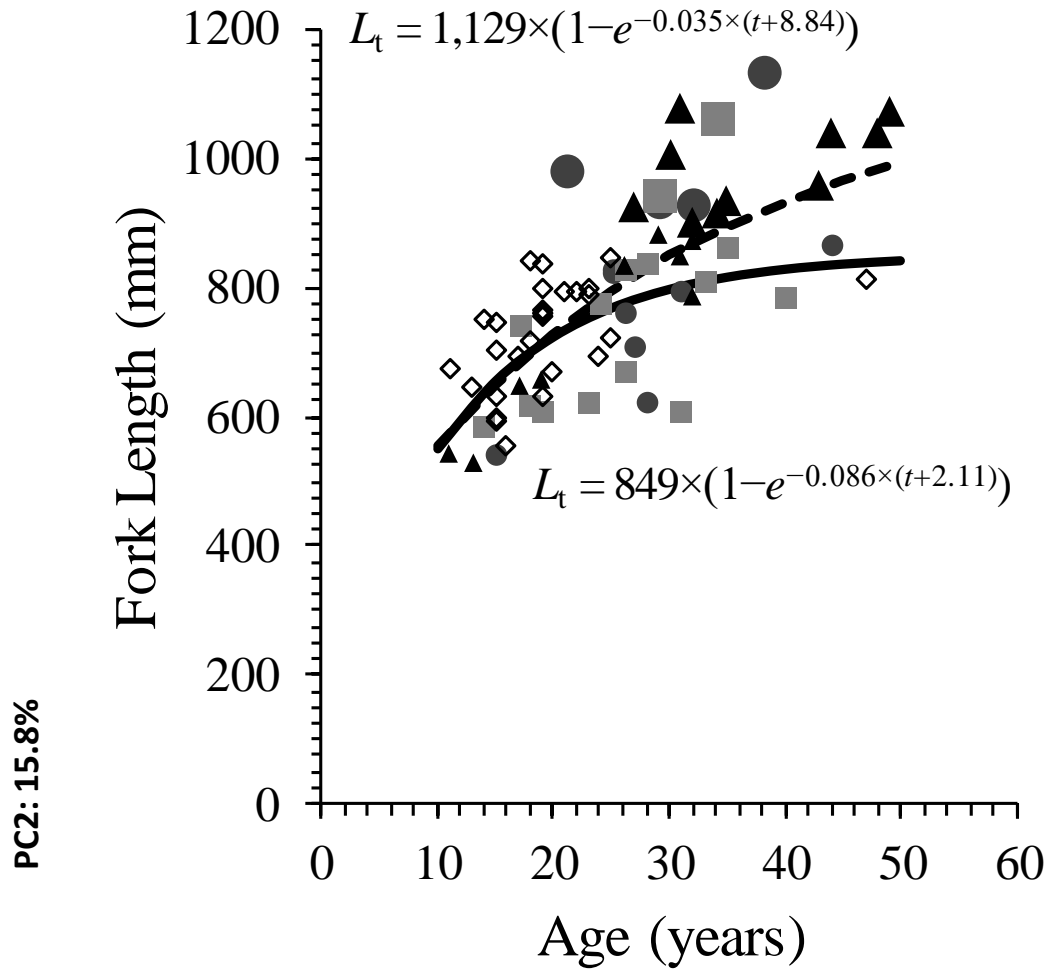

1166

1167 Fig. 3.

1168

1169

1170

1171

1172

1173

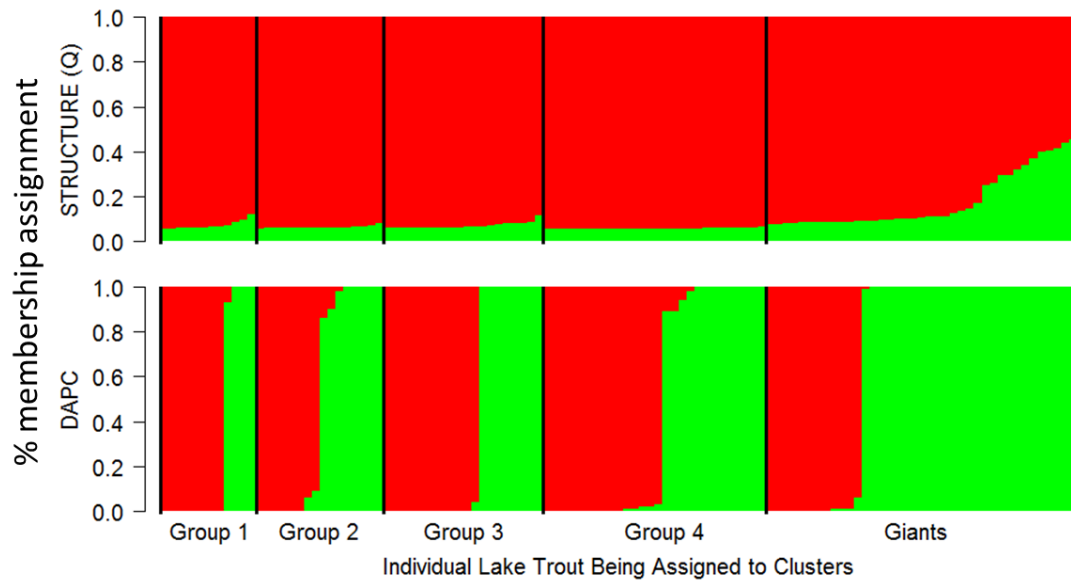

1174

1175 Fig. 4.

1176

1177

1178

1179

1180

1181

1182

1183

1184

1185

1186



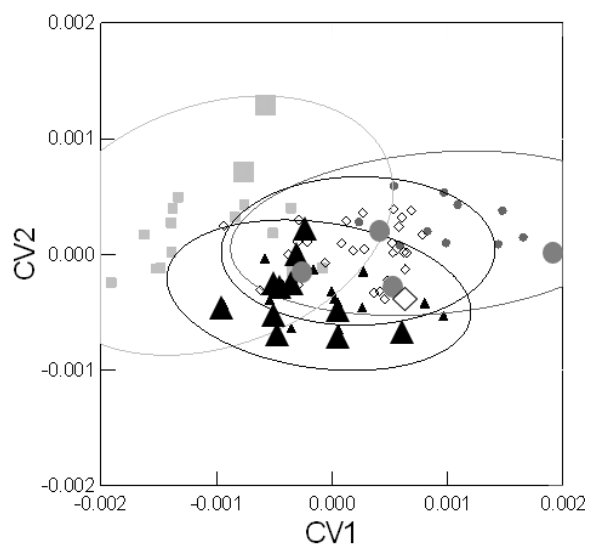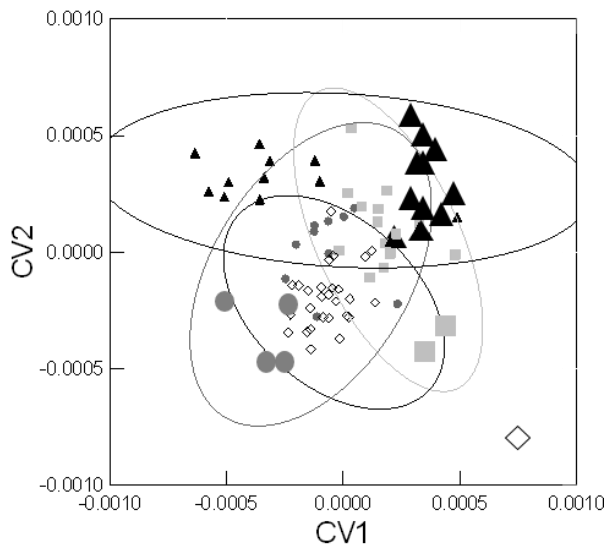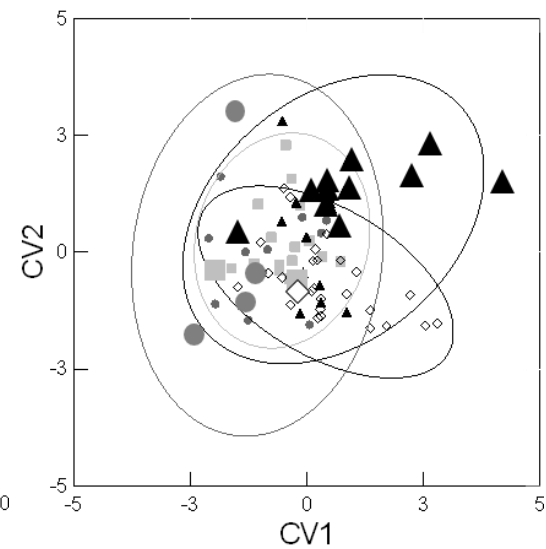

1187

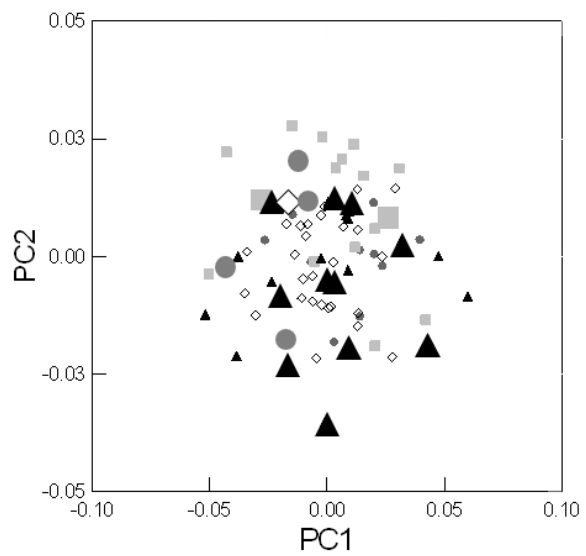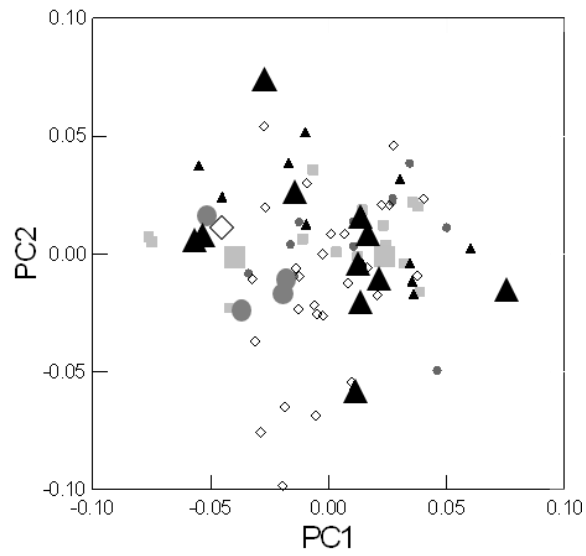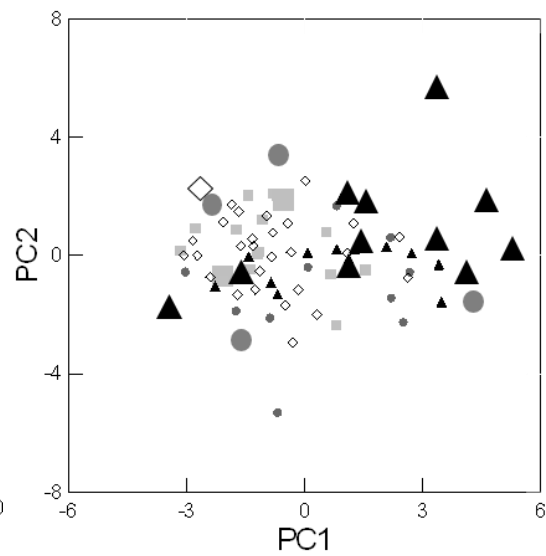

1188

1189 Fig. 5

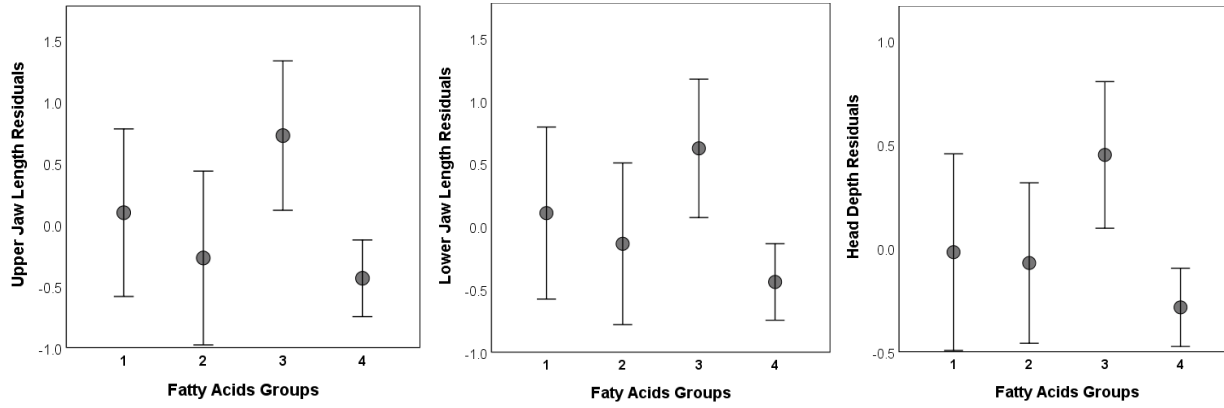

1190

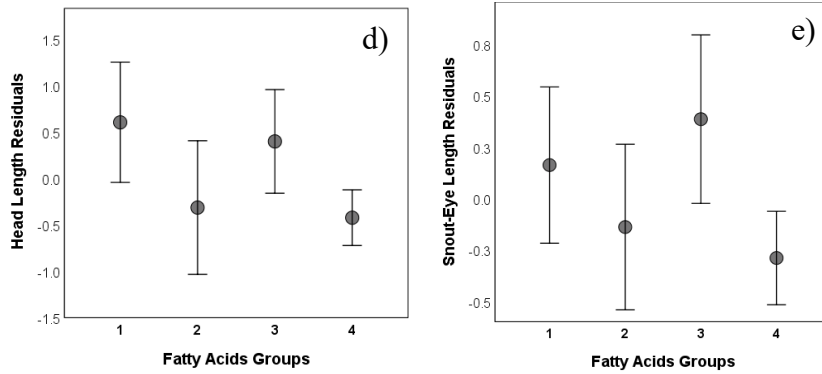

1191

1192 Fig. 6

1193

1192 **Appendix:**

1193 Table A1. Spatial and temporal information for the 79 Lake Trout classified as piscivorous  
 1194 morph from Great Bear Lake and analyzed for fatty acids. Sample sizes are in brackets.

**Sample information**

---

|                     |                                                                                                                |                                                                                               |
|---------------------|----------------------------------------------------------------------------------------------------------------|-----------------------------------------------------------------------------------------------|
| <b>Group 1</b> (14) | Dease 2005 (1)<br>Dease 2010 (1)<br>McTavish 2009 (6)<br>McVicar 2008 (1)<br>Smith 2006 (4)                    | Smith 2011 (1)                                                                                |
| <b>Group 2</b> (16) | Dease 2010 (4)<br>Keith 2012 (2)<br>McTavish 2009 (1)<br>McTavish 2014 (2)<br>McVicar 2008 (1)                 | Smith 2006 (1)<br>Smith 2011 (5)                                                              |
| <b>Group 3</b> (21) | Dease 2005 (2)<br>Dease 2010 (3)<br>Keith 2012 (3)<br>McTavish 2004 (1)<br>McTavish 2014 (2)                   | McVicar 2003 (2)<br>McVicar 2008 (2)<br>McVicar 2013 (3)<br>Smith 2006 (1)<br>Smith 2011 (2)  |
| <b>Group 4</b> (28) | Dease 2005 (5)<br>Dease 2010 (2)<br>Keith 2002 (4)<br>Keith 2003 (4)<br>MCTavish 2004 (2)<br>McTavish 2009 (1) | McTavish 2014 (1)<br>McVicar 2003 (2)<br>McVicar 2008 (5)<br>Smith 2006 (1)<br>Smith 2011 (1) |

---

1195

1196

1197

1198

1199

1200 Table A2. Bayesian clustering (i.e., STRUCTURE, Pritchard et al. 2000) results for piscivorous  
 1201 morphotypes of lake trout from Great Bear Lake assessed using variation at 19 microsatellite  
 1202 markers. Shown are the mean log-likelihood values (LnP[D]) for different hypothesized

1203 numbers of genetic populations (K) and the mean value of  $\Delta K$  statistic of Evanno et al. (2005).  
1204 Bold values represent the most likely number of genetic groups indicated by  $\Delta K$ . Dashes = not  
1205 applicable given that  $\Delta K$  cannot be calculated for these values of K. For all STRUCTURE  
1206 analyses, we employed an admixture model with the LOCPRIOR algorithm, correlated allelic  
1207 frequencies, 100,000 burn-in and MCMC iterations and 10 iterations per K value were  
1208 completed.

| K  | Reps | Mean<br>LnP(D)   | Delta<br>K  |
|----|------|------------------|-------------|
| 1  | 10   | -10271.83        | —           |
| 2  | 10   | <b>-10266.25</b> | <b>9.26</b> |
| 3  | 10   | -10572.68        | 0.03        |
| 4  | 10   | -10868.33        | 1.39        |
| 5  | 10   | -10739.53        | 0.45        |
| 6  | 10   | -10806.97        | 0.84        |
| 7  | 10   | -10678.37        | 0.66        |
| 8  | 10   | -10739.90        | 0.13        |
| 9  | 10   | -10862.98        | 1.09        |
| 10 | 10   | -10553.04        | —           |

1209

1210

1211

1212

1213

1214

1215

1216

1217

1218

1219

1220

1221

1222

1223

1224

1225

1226 Table A3. Results of the discriminant analysis of principal components (DAPC, Jombart et al.  
1227 2010) implemented in the Adegenet package (Jombart et al. 2008) to determine the most likely

1228 number of genetic clusters (K) within the piscivorous Lake Trout form Great Bear Lake. The  
1229 number of groups was identified using the `find.clusters` function (a sequential K-means  
1230 clustering algorithm) and subsequent Bayesian Information Criterion (BIC), as suggested by  
1231 Jombart et al. (2010). Stratified cross-validation carried out with the function `xvalDapc` was  
1232 employed to determine the optimal number of PCs to retain in the analysis.  
1233

| <b>K</b> | <b>BIC</b> |
|----------|------------|
| 1        | 185.98     |
| 2        | 185.42     |
| 3        | 185.89     |
| 4        | 186.51     |
| 5        | 187.40     |
| 6        | 189.10     |
| 7        | 190.64     |
| 8        | 191.99     |
| 9        | 193.61     |
| 10       | 195.67     |

1234

1235

1236

1237

1238

1239

1240

1241

1242

1243

1244

1245

1246 Table A4. Microsatellite loci used in this study and  $F_{is}$  values for each group per locus.

---

| <b>Locus</b>    | <b>Group 1</b> | <b>Group 2</b> | <b>Group 3</b> | <b>Group 4</b> | <b>Giant</b> |
|-----------------|----------------|----------------|----------------|----------------|--------------|
| <b>OtsG83b</b>  | -0.021         | 0.017          | 0.046          | 0.090          | -0.013       |
| <b>Sco215</b>   | 0.061          | 0.042          | -0.011         | -0.029         | 0.071        |
| <b>Smm17</b>    | -0.433         | -0.069         | -0.038         | -0.304         | -0.012       |
| <b>Smm21</b>    | -0.143         | -0.286         | -0.266         | 0.023          | 0.028        |
| <b>SnaMSU1</b>  | 0.012          | -0.069         | -0.024         | -0.028         | -0.074       |
| <b>SnaMSU8</b>  | -0.031         | 0.002          | 0.048          | 0.023          | 0.081        |
| <b>OMM1105</b>  | 0.094          | -0.075         | -0.041         | -0.098         | -0.065       |
| <b>Smm22</b>    | -0.014         | 0.055          | 0.082          | -0.088         | 0.137        |
| <b>SnaMSU13</b> | -0.105         | 0.053          | 0.136          | -0.073         | -0.049       |
| <b>SnaMSU5</b>  | 0.088          | 0.065          | -0.032         | 0.039          | 0.159        |
| <b>Sco19</b>    | -0.082         | 0.190          | 0.067          | -0.009         | 0.051        |
| <b>Sco202</b>   | 0.107          | -0.166         | 0.047          | 0.115          | -0.080       |
| <b>SnaMSU10</b> | -0.108         | -0.030         | 0.086          | 0.096          | 0.203        |
| <b>SnaMSU12</b> | 0.122          | 0.069          | 0.123          | 0.201          | 0.072        |
| <b>SnaMSU6</b>  | 0.008          | -0.090         | 0.002          | 0.007          | 0.207        |
| <b>Sal38</b>    | -0.056         | 0.121          | -0.016         | -0.012         | 0.041        |
| <b>Sco200</b>   | -0.015         | 0.098          | -0.096         | 0.041          | 0.244        |
| <b>SnaMSU11</b> | -0.060         | -0.108         | -0.012         | 0.083          | -0.011       |
| <b>SnaMSU3</b>  | 0.059          | -0.019         | 0.065          | 0.012          | 0.085        |
| <b>Overall</b>  | -0.027         | -0.011         | 0.009          | 0.005          | 0.057        |

---

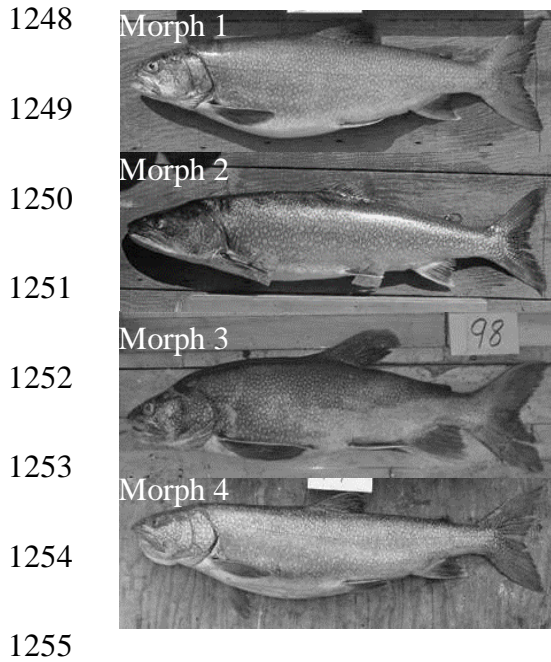

1256 Fig. A1. The four shallow-water morphotypes of Lake Trout from Great Bear Lake identified in  
1257 Chavarie et al. (2013, 2015, 2016a, 2016b): the generalist, the piscivore, the benthic-oriented,  
1258 and the pelagic specialist, Morphs1-4, respectively.

1259

1260

1261

1262

1263

### Hierarchical clustering on the factor map

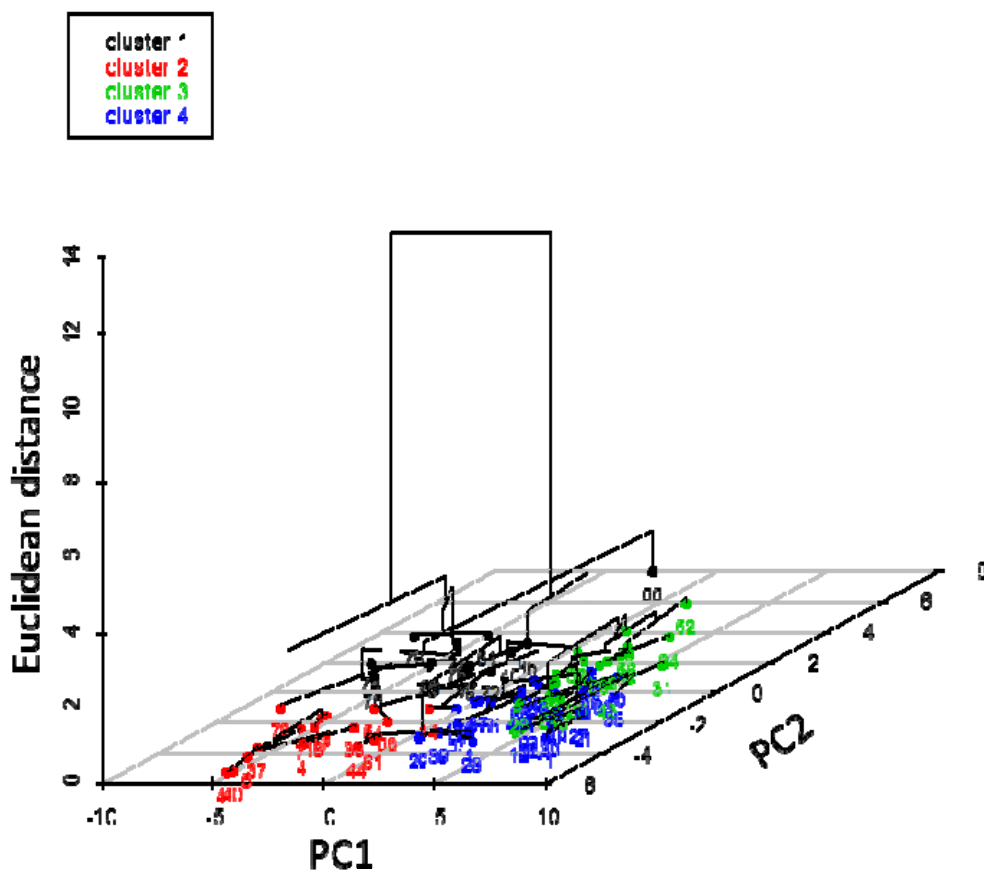

1264  
1265  
1266  
1267  
1268  
1269  
1270  
1271  
1272  
1273  
1274  
1275  
1276  
1277  
1278  
1279  
1280  
1281  
1282  
1283

Fig. A2. Hierarchical clusters of Great Bear Lake Lake Trout fatty acids profiles overlaid on the first two principal component axes (PCA) using FactoMineR.



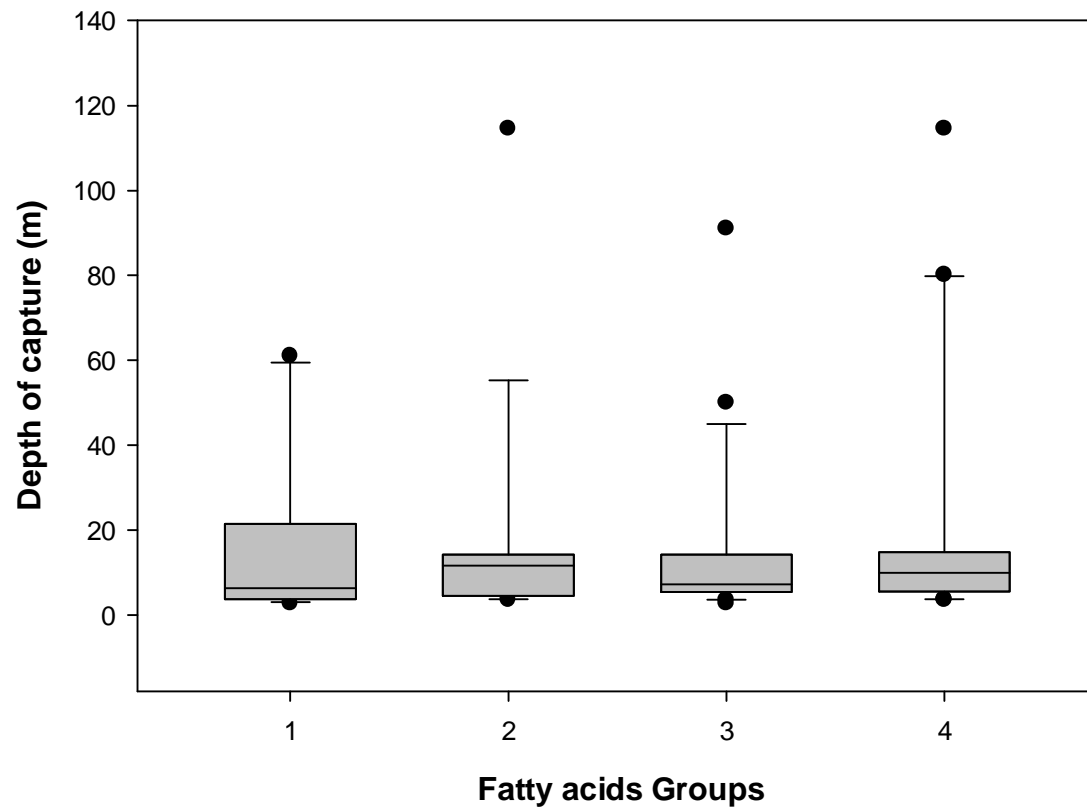

1284  
1285  
1286  
1287  
1288  
1289  
1290  
1291  
1292  
1293  
1294  
1295  
1296  
1297  
1298

Fig. A3. Depth of capture for four groups of piscivorous Lake Trout from Great Bear Lake (Groups identified by fatty acids profiles of individuals). Outliers are represented by a circle.

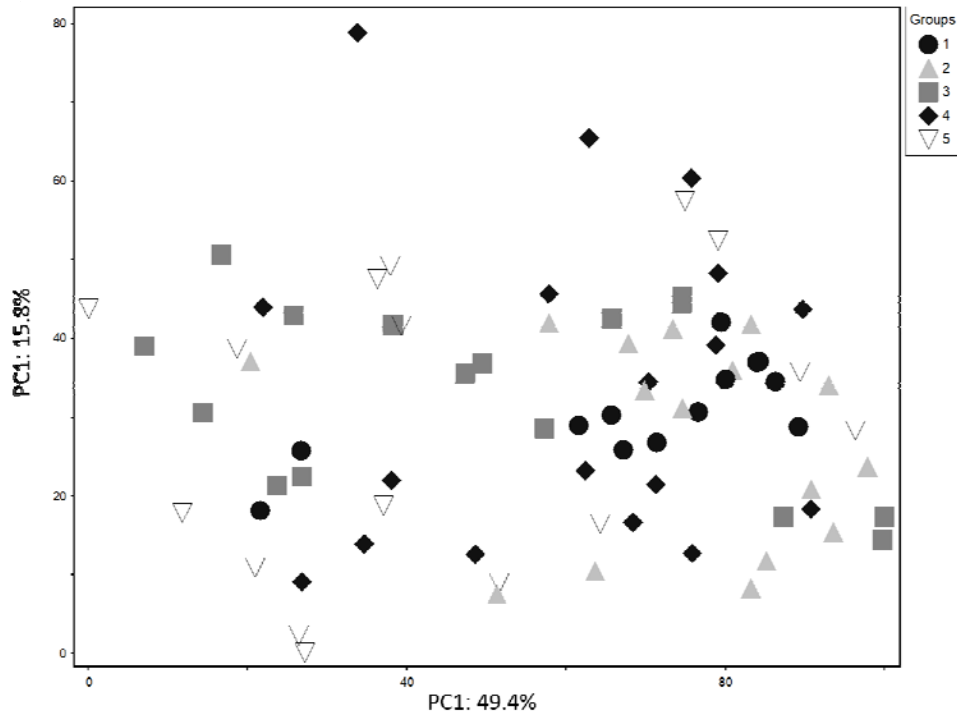

1299 a)

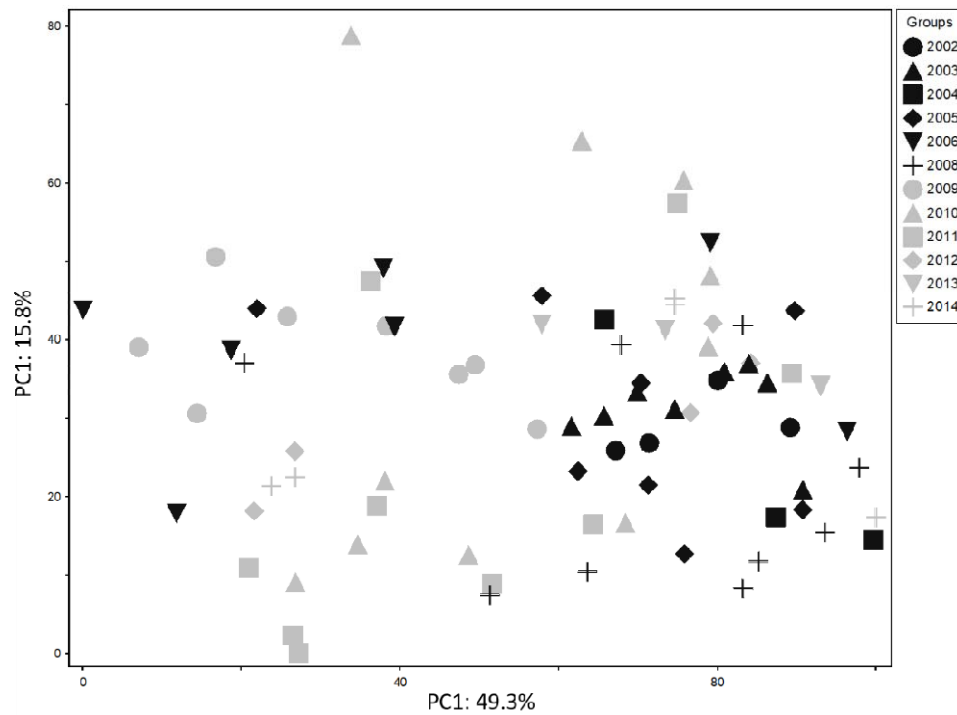

1300 b)

1301 Fig. A4. Principal Component Analysis (PCA) of fatty acids of 79 Lake Trout classified as  
1302 piscivorous morph from Great Bear Lake, based on the proportions of 41 fatty acids in dorsal  
1303 muscle tissue. Spatial variations (5 arms; 1=Keith, 2=McVicar, 3=McTavish, 4=Dease, and  
1304 5=Smith) are represented in a) and temporal (12 years) variations are represented in b), based on  
1305 the fatty acids profile of each lake trout analyzed in this study.

1306

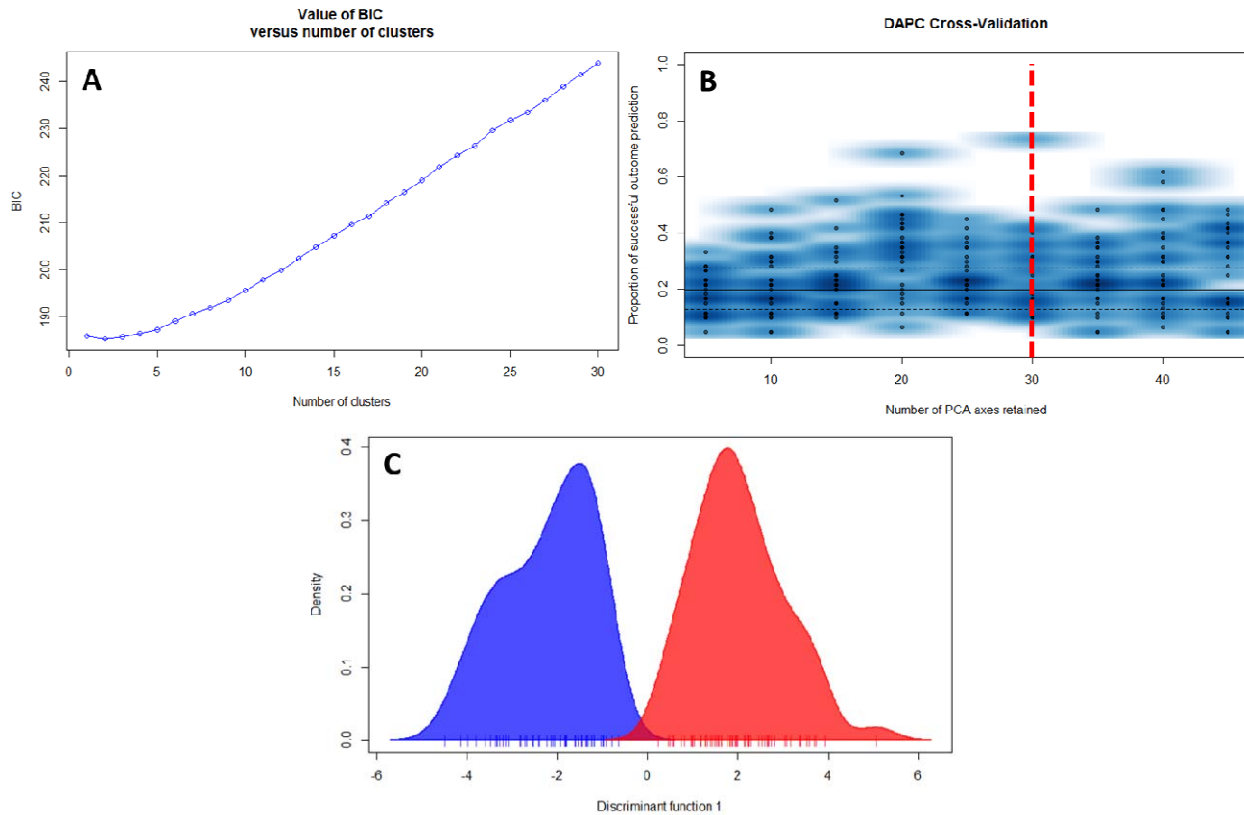

1307  
1308  
1309  
1310  
1311  
1312  
1313  
1314  
1315

Fig. A5. Summary of the DAPC analysis. (A) Results of the cross-validation analysis used to determine the number of PCs to retain in the DAPC analysis. Cross-validation analysis determined the most appropriate number of PCs retained was 30. (B) Inference of the number of clusters in the DAPC performed on piscivorous Lake Trout from Great Bear Lake. The function `find.clusters` was run with a maximum number of clusters of 10 to identify the optimal number of clusters based on the BIC values. A K value of 2 (the lowest BIC value) represents the best summary of the data (most probable number of (K)). (C) The results of the discriminant function that shows that the two clusters are mostly non-overlapping.
